# Supplementary material
Source: MDPI journal article supplement (https://www.mdpi.com/2073-4441/12/11/3123)
Supplement: s1 [file s1]

# 11. Lake Chiuta Catchment

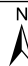

## Summary Statistics

| Geogenic Groundwater Fluoride Zones | No. of Water Points |      | No. of Users |
|-------------------------------------|---------------------|------|--------------|
|                                     | <i>n</i>            | %    |              |
| *Excessive (Hot Springs)            | 0                   | 0    | 0            |
| *Elevated                           | 1                   | 0.1  | 250          |
| Moderate-high                       | 0                   | 0    | 0            |
| Moderate-low                        | 1,395               | 95.5 | 418,676      |
| Low                                 | 65                  | 4.4  | 16,270       |
| Insufficient Data                   | 0                   | 0    | 0            |

ALL water points are direct groundwater sources and are either functional or partly functional.  
 No. of users calculation is based on the number of users per each individual water point.  
 No. of users for hot springs based on average number of users per water point for district.  
 \* Requires priority review and replacement water supply

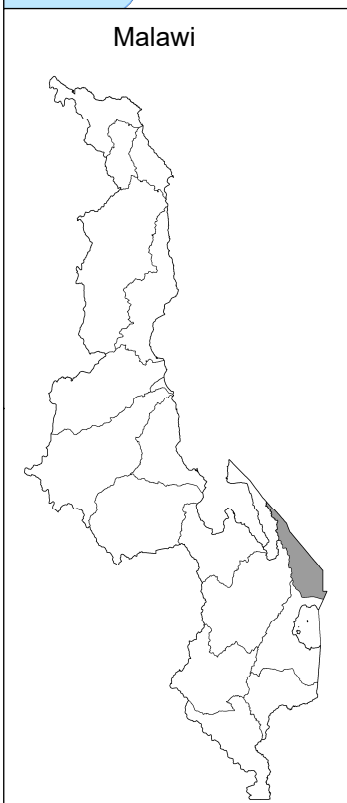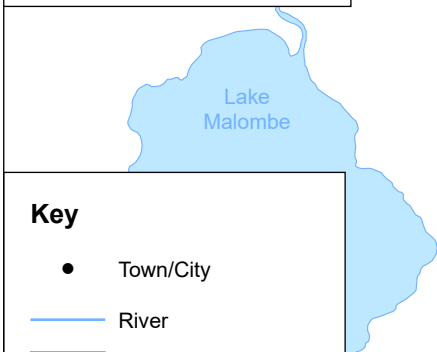

## Key

- Town/City
- River
- Waterbody
- Malawi Border
- Catchment Boundary

## Geogenic Groundwater Fluoride Zones

- ELEVATED GEOGENIC FLUORIDE (>60% likelihood of fluoride exceeding \*1.5 mg/l & 0% likelihood of fluoride exceeding \*\*4 mg/l)
- MODERATE-LOW GEOGENIC FLUORIDE (10-17% likelihood of fluoride exceeding \*1.5 mg/l & 0% likelihood of fluoride exceeding \*\*4 mg/l)
- LOW GEOGENIC FLUORIDE (<10% likelihood of fluoride exceeding \*1.5 mg/l & 0% likelihood of fluoride exceeding \*\*4 mg/l)

\*WHO standard limit for fluoride in drinking water  
 \*\*Malawian proposed interim standard for fluoride in drinking water

0 3.5 7 14 21 28 Kilometers
