# Supplementary material
Source: MDPI journal article supplement (https://www.mdpi.com/2073-4441/12/11/3123)
Supplement: s1 [file s1]

# 1-2. Shire River Catchment (Middle Shire)

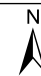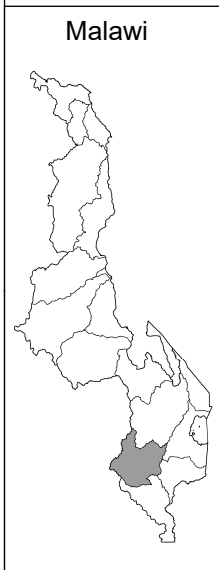

Mozambique

## Key

- Town/City
- Malawi Border
- Catchment Boundary
- Waterbody
- River
- Fault

## Geogenic Groundwater Fluoride Zones

- ★ **EXCESSIVE GEOGENIC FLUORIDE - Hot Spring**  
(100% likelihood of fluoride exceeding \*1.5 mg/l & 75% likelihood of fluoride exceeding \*\*4 mg/l)
- **ELEVATED GEOGENIC FLUORIDE (>60% likelihood of fluoride exceeding \*1.5 mg/l & 0% likelihood of fluoride exceeding \*\*4 mg/l)**
- **MODERATE-LOW GEOGENIC FLUORIDE (10-17% likelihood of fluoride exceeding \*1.5 mg/l & 0% likelihood of fluoride exceeding \*\*4 mg/l)**
- **LOW GEOGENIC FLUORIDE (<10% likelihood of fluoride exceeding \*1.5 mg/l & 0% likelihood of fluoride exceeding \*\*4 mg/l)**

\*WHO standard limit for fluoride in drinking water  
\*\*Malawian proposed interim standard for fluoride in drinking water

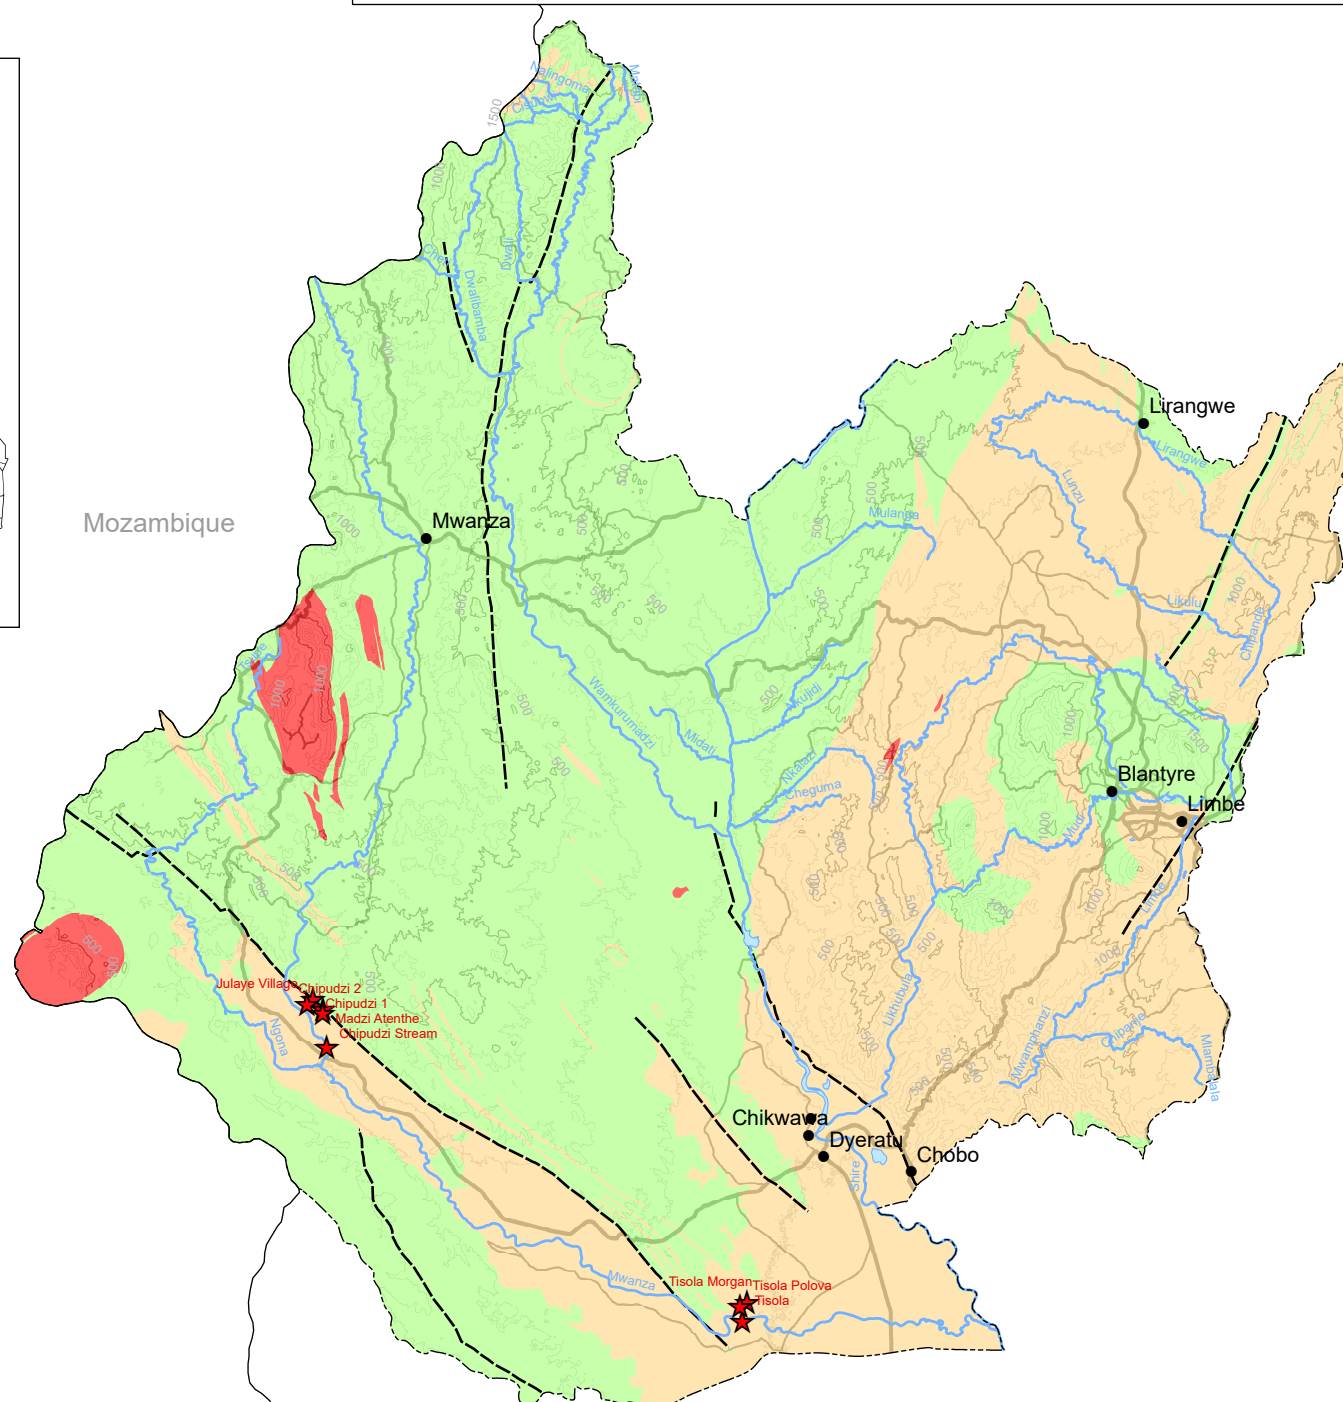

0 5 10 20 30 40 Kilometers

Mozambique
