# Supplementary material
Source: MDPI journal article supplement (https://www.mdpi.com/2073-4441/12/11/3123)
Supplement: s1 [file s1]

| District                                                                                    | No. of Water Points        |       |                                |       |                       |        |                   |       | No. of Users |                            |                                |                       |                   |         |
|---------------------------------------------------------------------------------------------|----------------------------|-------|--------------------------------|-------|-----------------------|--------|-------------------|-------|--------------|----------------------------|--------------------------------|-----------------------|-------------------|---------|
|                                                                                             | Elevated Geogenic Fluoride |       | Moderate-low Geogenic Fluoride |       | Low Geogenic Fluoride |        | Insufficient Data |       | Total        | Elevated Geogenic Fluoride | Moderate-low Geogenic Fluoride | Low Geogenic Fluoride | Insufficient Data | Total   |
| Balaka                                                                                      | 0                          | 0.0%  | 38                             | 61.3% | 24                    | 38.7%  | 0                 | 0.0%  | 62           | 0                          | 8,988                          | 8,679                 | 0                 | 17,667  |
| Blantyre                                                                                    | 0                          | 0.0%  | 238                            | 79.9% | 60                    | 20.1%  | 0                 | 0.0%  | 298          | 0                          | 33,663                         | 12,038                | 0                 | 45,701  |
| Chikwawa                                                                                    | 0                          | 0.0%  | 423                            | 79.7% | 91                    | 17.1%  | 17                | 3.2%  | 531          | 0                          | 62,360                         | 12,843                | 1,936             | 77,139  |
| Chiradzulu                                                                                  | 0                          | 0.0%  | 96                             | 66.7% | 48                    | 33.3%  | 0                 | 0.0%  | 144          | 0                          | 29,350                         | 17,357                | 0                 | 46,707  |
| Chitipa                                                                                     | 17                         | 9.6%  | 137                            | 77.4% | 20                    | 11.3%  | 3                 | 1.7%  | 177          | 2,385                      | 15,803                         | 3,620                 | 525               | 22,333  |
| Dedza                                                                                       | 1                          | 0.6%  | 112                            | 69.6% | 48                    | 29.8%  | 0                 | 0.0%  | 161          | 700                        | 36,908                         | 17,459                | 0                 | 55,067  |
| Dowa                                                                                        | 8                          | 6.7%  | 92                             | 76.7% | 20                    | 16.7%  | 0                 | 0.0%  | 120          | 2,730                      | 24,159                         | 6,563                 | 0                 | 33,452  |
| Karonga                                                                                     | 1                          | 0.6%  | 132                            | 82.5% | 3                     | 1.9%   | 24                | 15.0% | 160          | 55                         | 20,644                         | 230                   | 4,565             | 25,494  |
| Kasungu                                                                                     | 1                          | 1.0%  | 75                             | 75.8% | 23                    | 23.2%  | 0                 | 0.0%  | 99           | 200                        | 19,579                         | 5,649                 | 0                 | 25,428  |
| Lilongwe                                                                                    | 10                         | 4.1%  | 190                            | 77.9% | 44                    | 18.0%  | 0                 | 0.0%  | 244          | 4,060                      | 52,721                         | 15,560                | 0                 | 72,341  |
| Machinga                                                                                    | 1                          | 1.1%  | 77                             | 83.7% | 14                    | 15.2%  | 0                 | 0.0%  | 92           | 800                        | 22,479                         | 4,412                 | 0                 | 27,691  |
| Mangochi                                                                                    | 1                          | 0.3%  | 338                            | 88.3% | 44                    | 11.5%  | 0                 | 0.0%  | 383          | 250                        | 76,051                         | 12,479                | 0                 | 88,780  |
| Mchinji                                                                                     | 3                          | 2.9%  | 99                             | 96.1% | 1                     | 1.0%   | 0                 | 0.0%  | 103          | 750                        | 21,022                         | 450                   | 0                 | 22,222  |
| Mulanje                                                                                     | 0                          | 0.0%  | 109                            | 91.6% | 10                    | 8.4%   | 0                 | 0.0%  | 119          | 0                          | 20,933                         | 1,885                 | 0                 | 22,818  |
| Mwanza                                                                                      | 0                          | 0.0%  | 0                              | 0.0%  | 46                    | 100.0% | 0                 | 0.0%  | 46           | 0                          | 0                              | 11,542                | 0                 | 11,542  |
| Mzimba                                                                                      | 35                         | 9.4%  | 228                            | 61.3% | 108                   | 29.0%  | 1                 | 0.3%  | 372          | 6,329                      | 45,265                         | 15,197                | 70                | 66,861  |
| Neno                                                                                        | 0                          | 0.0%  | 2                              | 10.5% | 17                    | 89.5%  | 0                 | 0.0%  | 19           | 0                          | 400                            | 5,742                 | 0                 | 6,142   |
| Nkhata Bay                                                                                  | 0                          | 0.0%  | 22                             | 15.7% | 56                    | 40.0%  | 62                | 44.3% | 140          | 0                          | 3078                           | 7,432                 | 9,612             | 20,122  |
| Nkhotakota                                                                                  | 7                          | 8.4%  | 53                             | 63.9% | 23                    | 27.7%  | 0                 | 0.0%  | 83           | 1,760                      | 10,592                         | 3,271                 | 0                 | 15,623  |
| Nsanje                                                                                      | 1                          | 0.9%  | 82                             | 75.2% | 25                    | 22.9%  | 1                 | 0.9%  | 109          | 300                        | 19,247                         | 5,036                 | 600               | 25,183  |
| Ntcheu                                                                                      | 3                          | 2.1%  | 42                             | 29.6% | 97                    | 68.3%  | 0                 | 0.0%  | 142          | 1,400                      | 18,022                         | 32,814                | 0                 | 52,236  |
| Ntchisi                                                                                     | 0                          | 0.0%  | 64                             | 84.2% | 12                    | 15.8%  | 0                 | 0.0%  | 76           | 0                          | 17,717                         | 2,105                 | 0                 | 19,822  |
| Phalombe                                                                                    | 0                          | 0.0%  | 106                            | 97.2% | 3                     | 2.8%   | 0                 | 0.0%  | 109          | 0                          | 22,091                         | 665                   | 0                 | 22,756  |
| Rumphi                                                                                      | 16                         | 22.2% | 44                             | 61.1% | 8                     | 11.1%  | 4                 | 5.6%  | 72           | 3,053                      | 11,035                         | 2,590                 | 1,325             | 18,003  |
| Salima                                                                                      | 1                          | 2.0%  | 39                             | 78.0% | 10                    | 20.0%  | 0                 | 0.0%  | 50           | 300                        | 7,827                          | 3,095                 | 0                 | 11,222  |
| Thyolo                                                                                      | 0                          | 0.0%  | 151                            | 86.3% | 24                    | 13.7%  | 0                 | 0.0%  | 175          | 0                          | 36,856                         | 4,294                 | 0                 | 41,150  |
| Zomba                                                                                       | 1                          | 1.4%  | 68                             | 98.6% | 0                     | 0.0%   | 0                 | 0.0%  | 69           | 450                        | 20,515                         | 0                     | 0                 | 20,965  |
| AUNA                                                                                        | 0                          | 0.0%  | 2                              | 66.7% | 1                     | 33.3%  | 0                 | 0.0%  | 3            | 0                          | 375                            | 300                   | 0                 | 675     |
| Total                                                                                       | 107                        | 2.6%  | 3,059                          | 73.6% | 880                   | 21.2%  | 112               | 2.7%  | 4,158        | 25,522                     | 657,680                        | 213,307               | 18,633            | 915,142 |
| % of Malawi Population                                                                      |                            |       |                                |       |                       |        |                   |       |              | 0.1%                       | 3.7%                           | 1.2%                  | 0.1%              | 5%      |
| * All water points are direct groundwater sources and are currently not functional.         |                            |       |                                |       |                       |        |                   |       |              |                            |                                |                       |                   |         |
| * No. of users calculation is based on the number of users per each individual water point. |                            |       |                                |       |                       |        |                   |       |              |                            |                                |                       |                   |         |
| *AUNA = Area Under National Administration                                                  |                            |       |                                |       |                       |        |                   |       |              |                            |                                |                       |                   |         |

**Table A1.** Table showing data on number of ‘not functional’ water points in each fluoride zone and the corresponding number of people at risk per zone, split by district.
