# Supplementary material
Source: MDPI journal article supplement (https://www.mdpi.com/2073-4441/12/11/3123)
Supplement: s1 [file s1]

# 6. Dwanga Catchment

| Summary Statistics                  |                     |      |              |
|-------------------------------------|---------------------|------|--------------|
| Geogenic Groundwater Fluoride Zones | No. of Water Points |      | No. of Users |
|                                     | n                   | %    |              |
| *Excessive (Hot Springs)            | 0                   | 0    | 0            |
| *Elevated                           | 338                 | 15.6 | 39,080       |
| Moderate-high                       | 0                   | 0    | 0            |
| Moderate-low                        | 1,187               | 54.9 | 281,363      |
| Low                                 | 636                 | 29.4 | 107,318      |
| Insufficient Data                   | 0                   | 0    | 0            |

ALL water points are direct groundwater sources and are either functional or partly functional.  
No. of users calculation is based on the number of users per each individual water point.  
No. of users for hot springs based on average number of users per water point for district.  
\* Requires priority review and replacement water supply

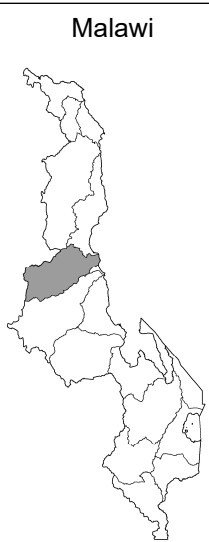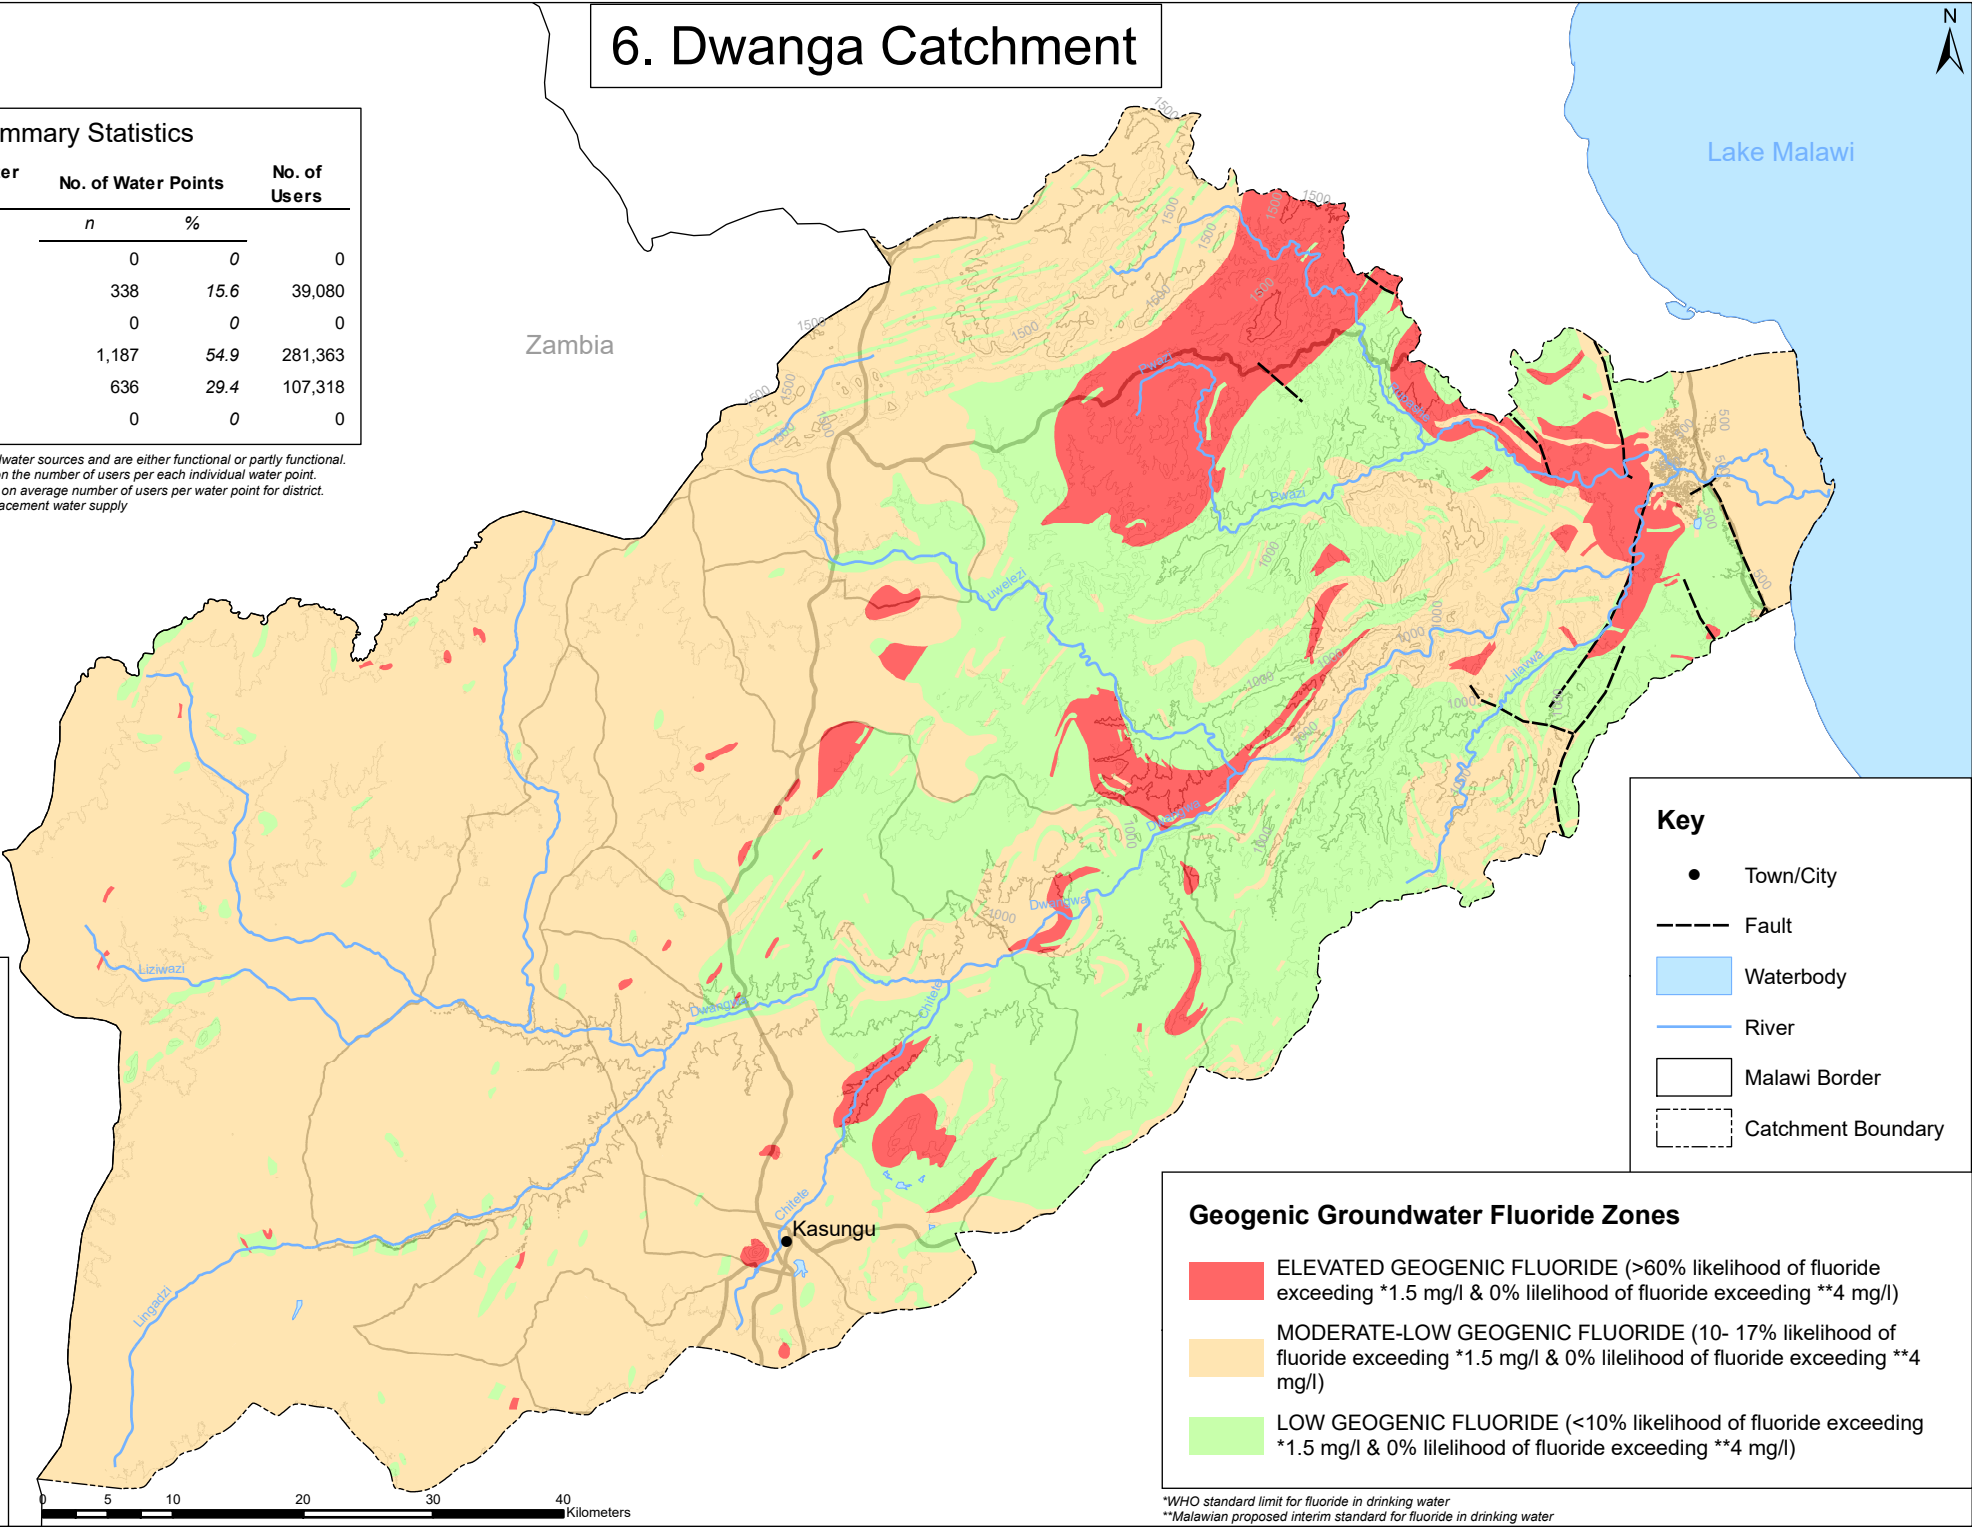

Key

Town/City

Fault

Waterbody

River

Malawi Border

Catchment Boundary

Geogenic Groundwater Fluoride Zones

ELEVATED GEOGENIC FLUORIDE (>60% likelihood of fluoride exceeding \*1.5 mg/l & 0% lilelihood of fluoride exceeding \*\*4 mg/l)

MODERATE-LOW GEOGENIC FLUORIDE (10- 17% likelihood of fluoride exceeding \*1.5 mg/l & 0% lilelihood of fluoride exceeding \*\*4 mg/l)

LOW GEOGENIC FLUORIDE (<10% likelihood of fluoride exceeding \*1.5 mg/l & 0% lilelihood of fluoride exceeding \*\*4 mg/l)

\*WHO standard limit for fluoride in drinking water

\*\*Malawian proposed interim standard for fluoride in drinking water
