# Supplementary material
Source: MDPI journal article supplement (https://www.mdpi.com/2073-4441/12/11/3123)

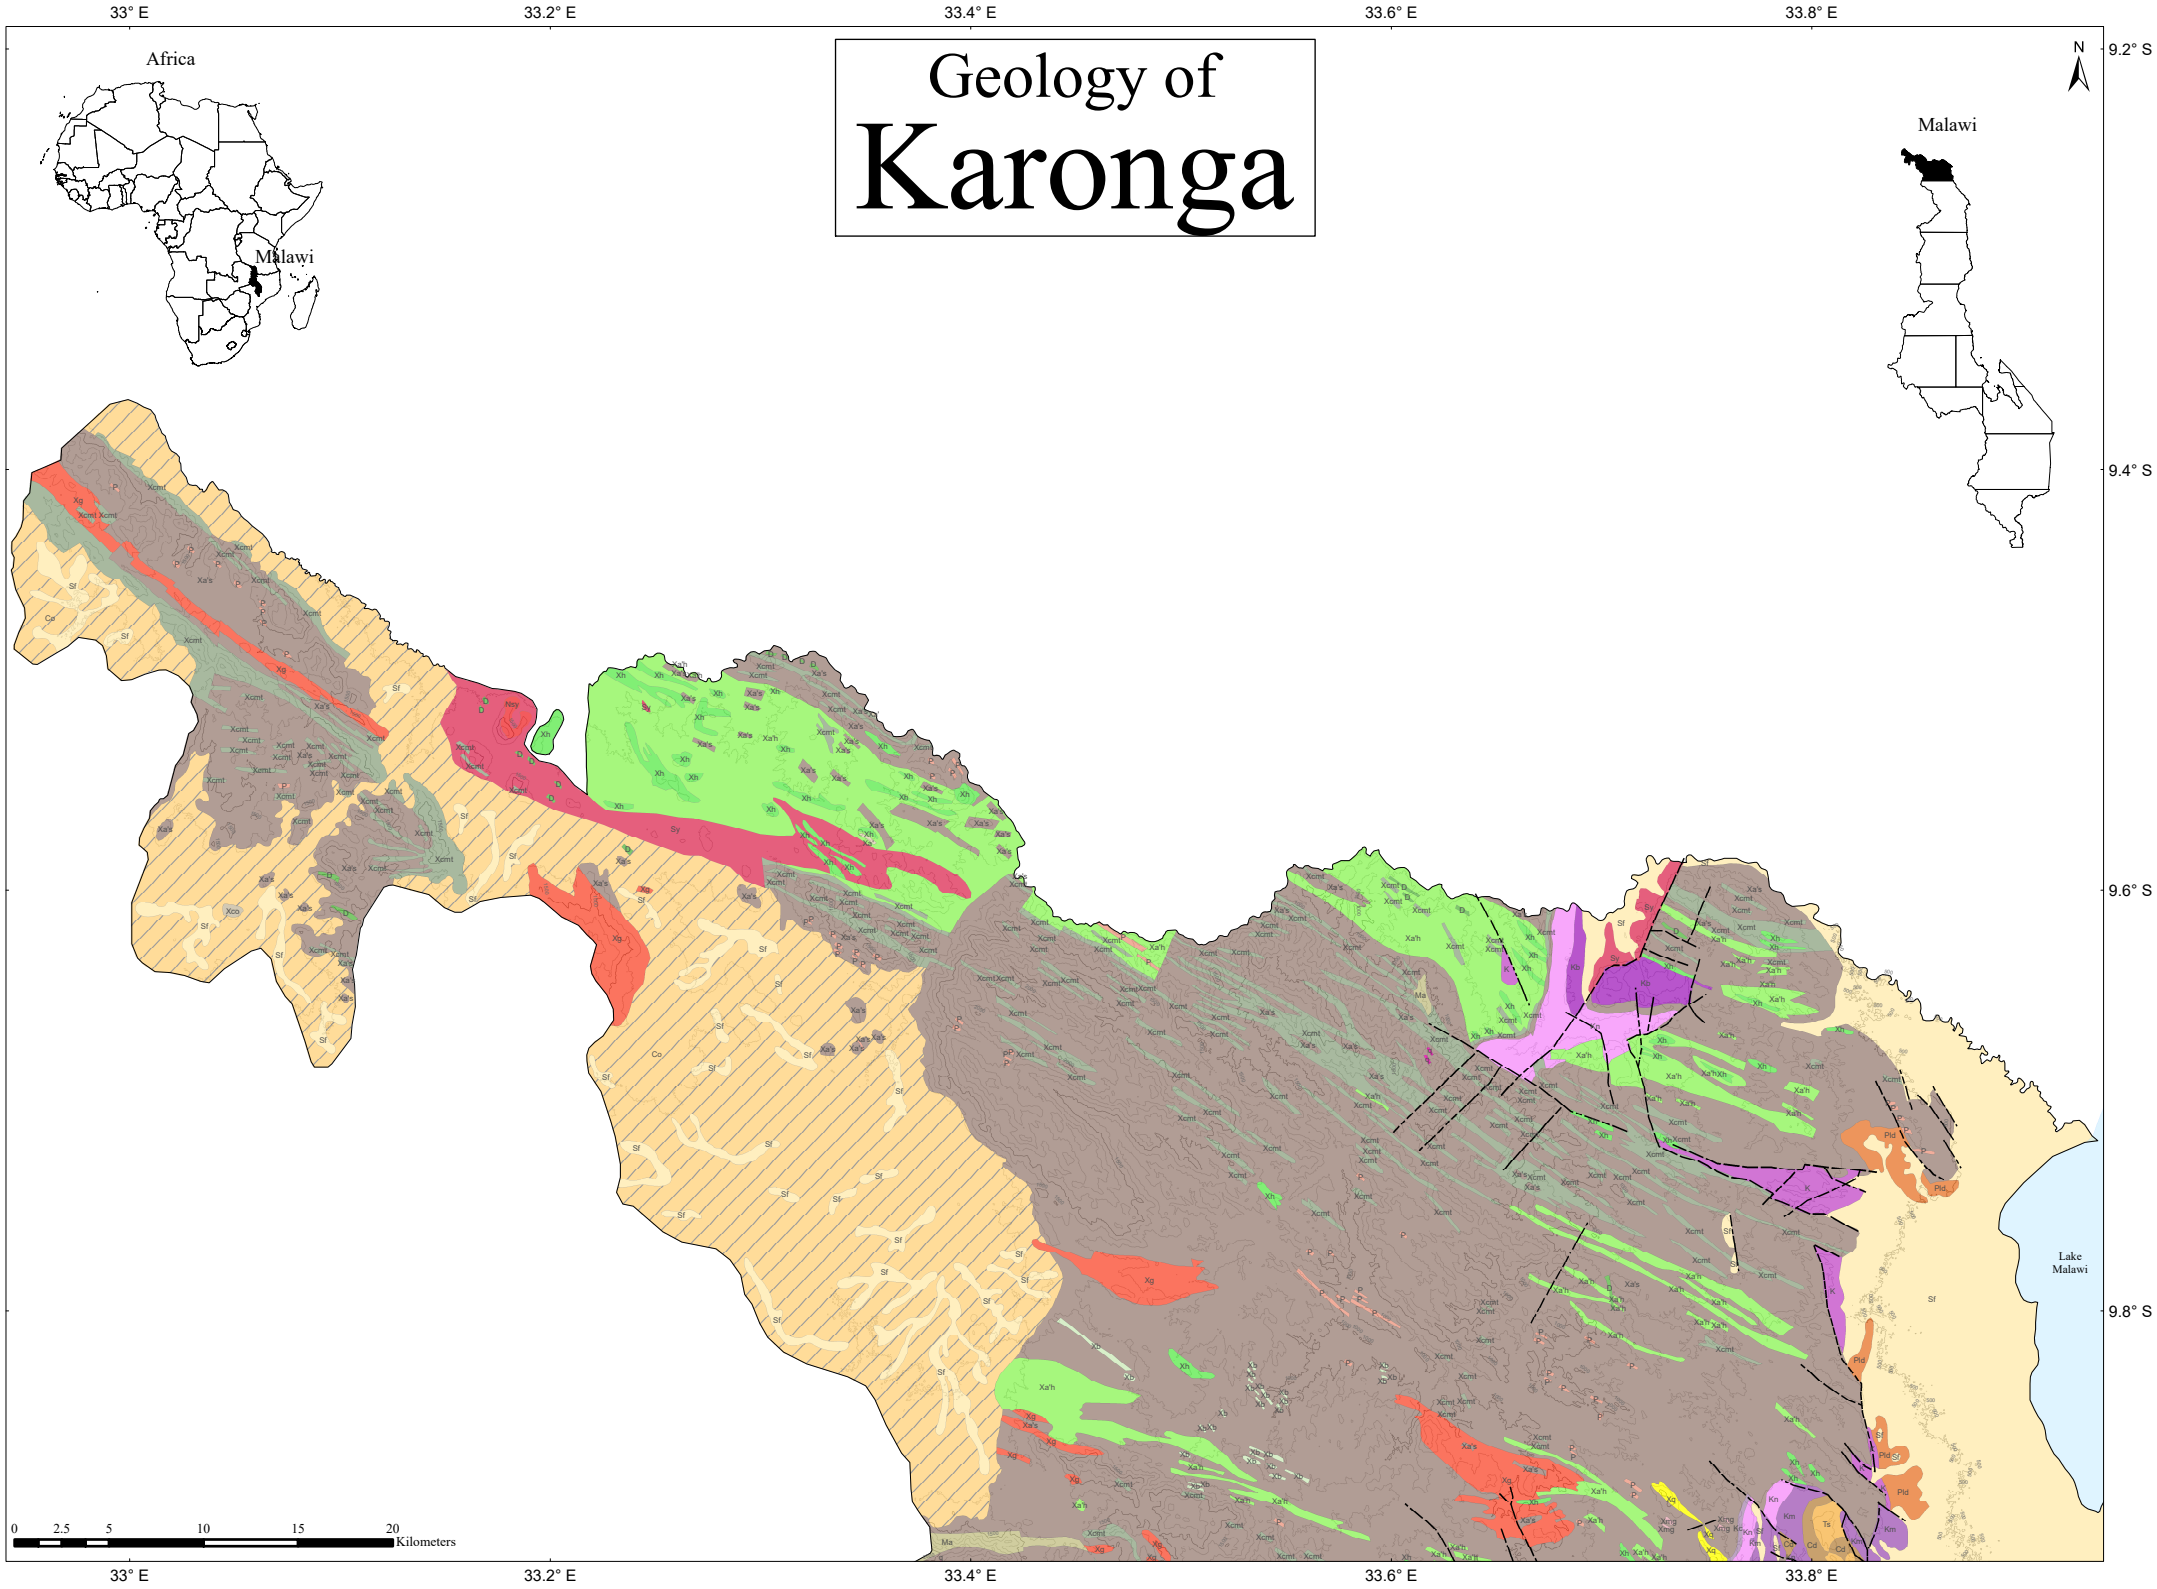

Supplement: s1 [file s1]

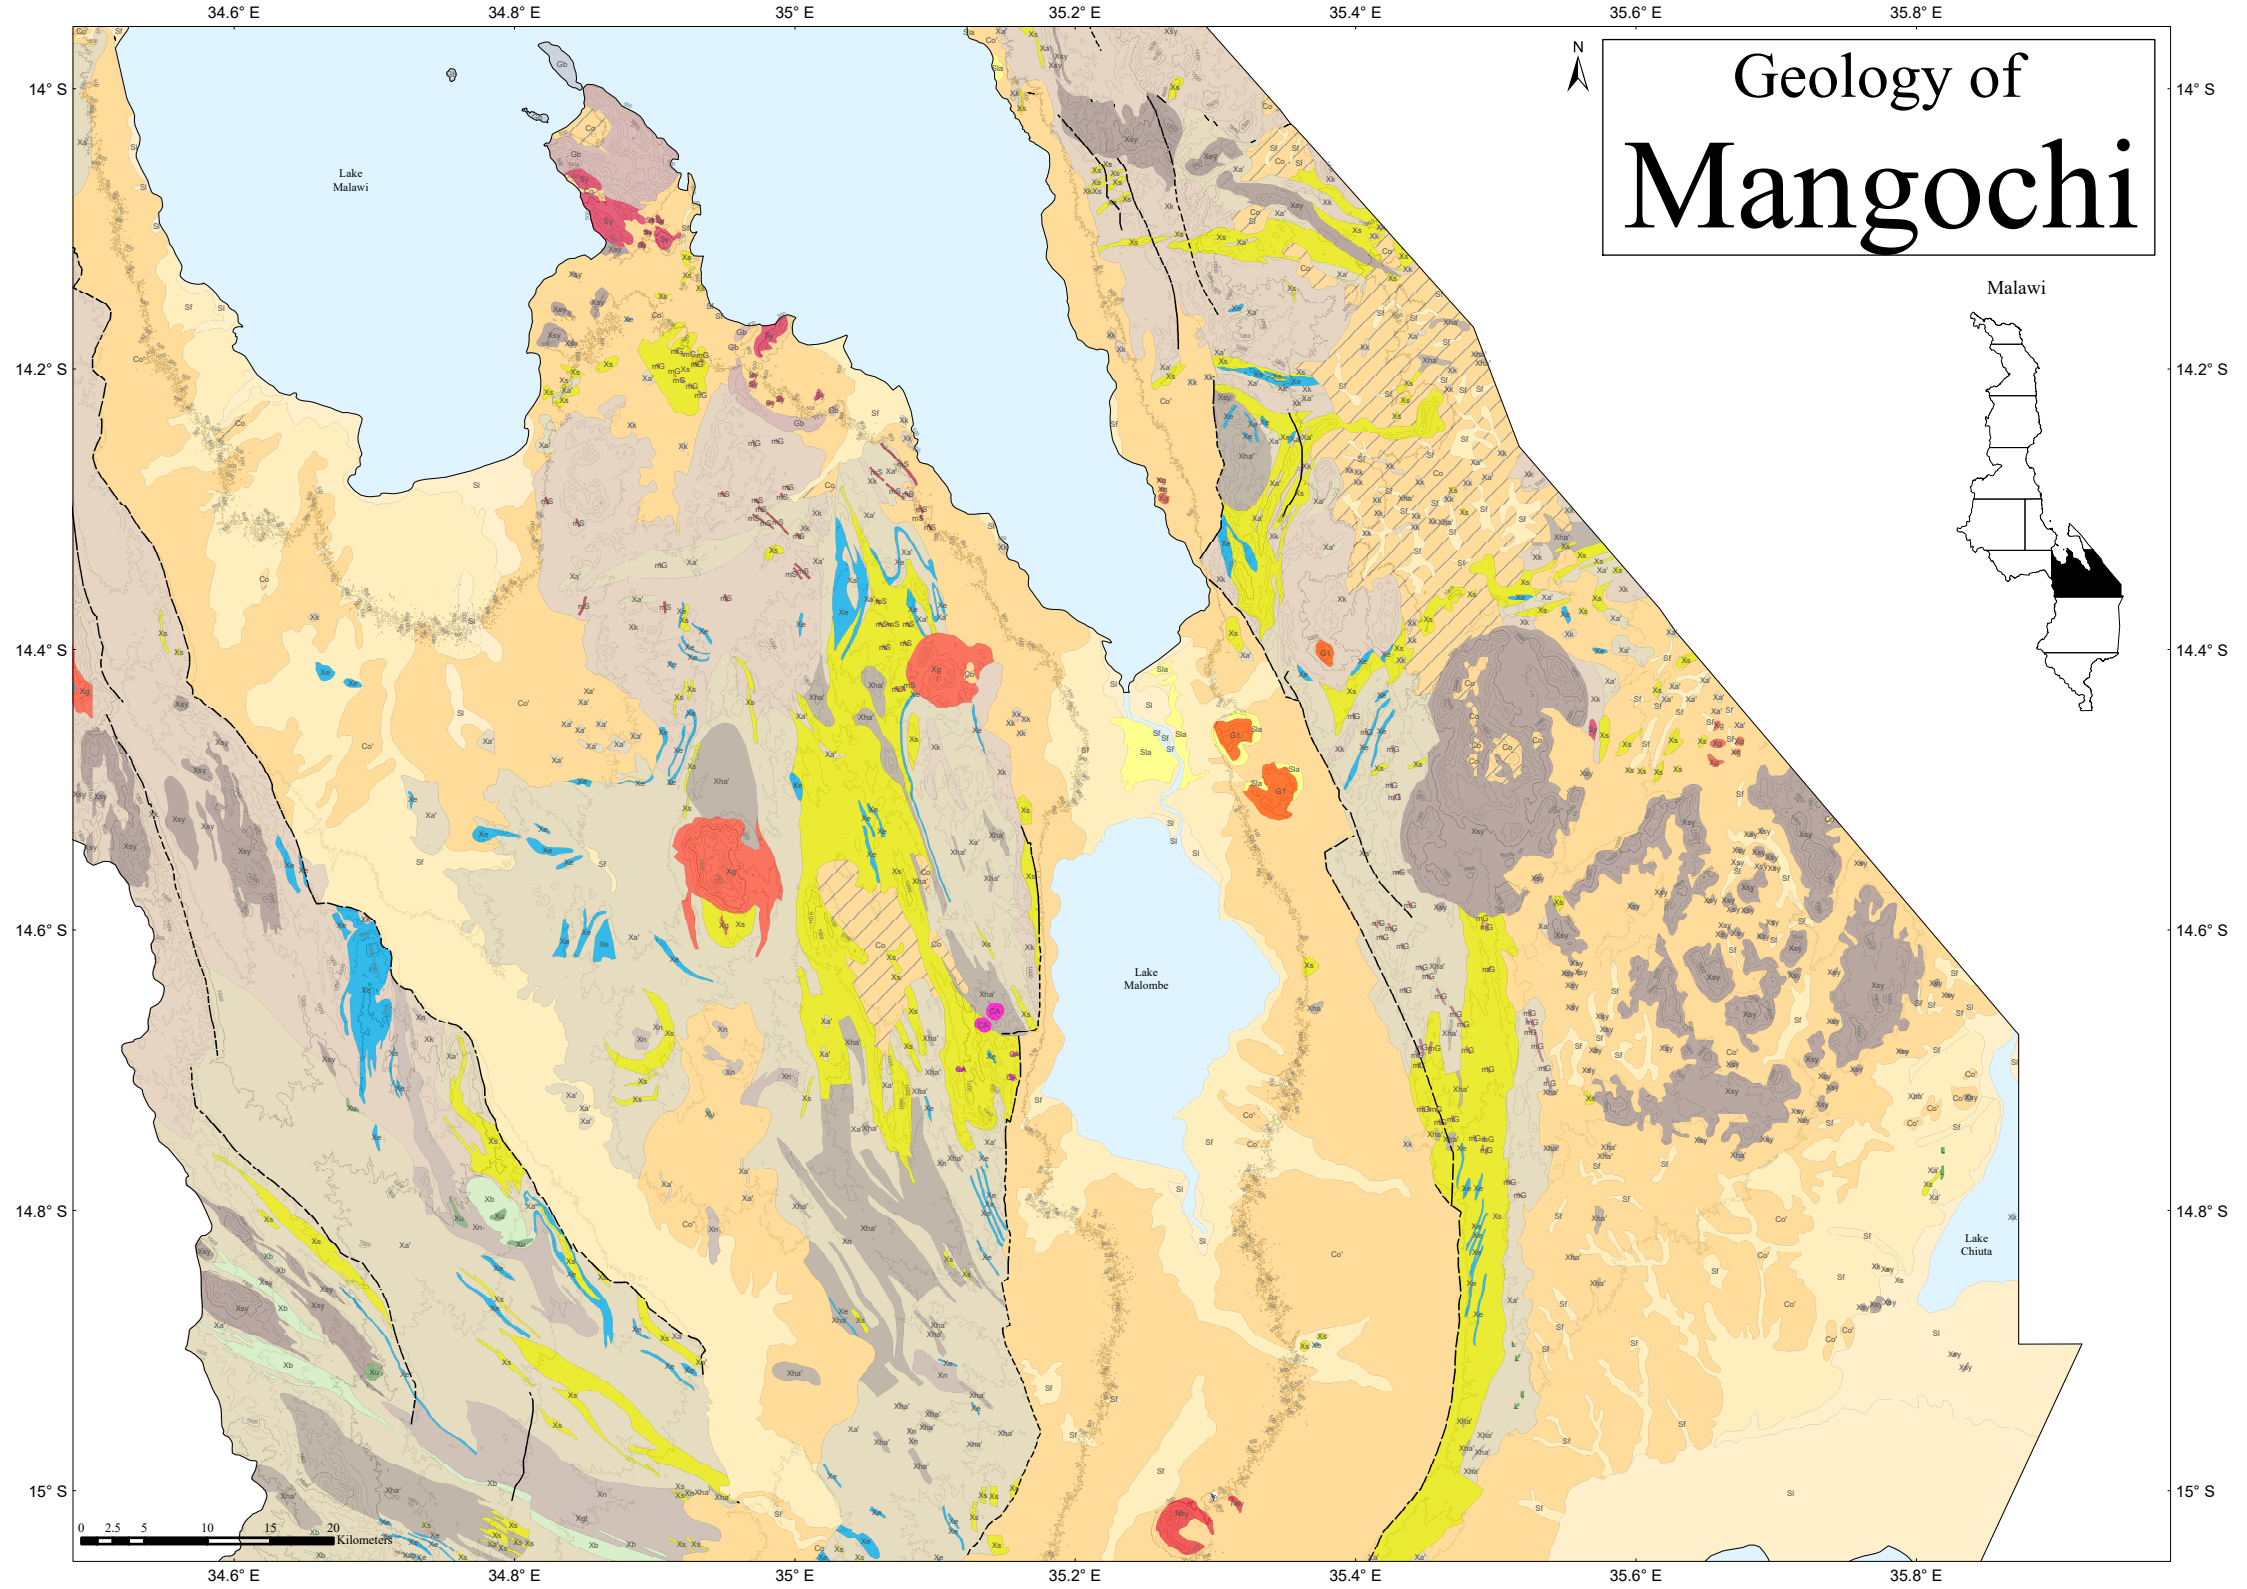

Supplement: s1 [file s1]

# 1-3. Shire River Catchment (Lower Shire)

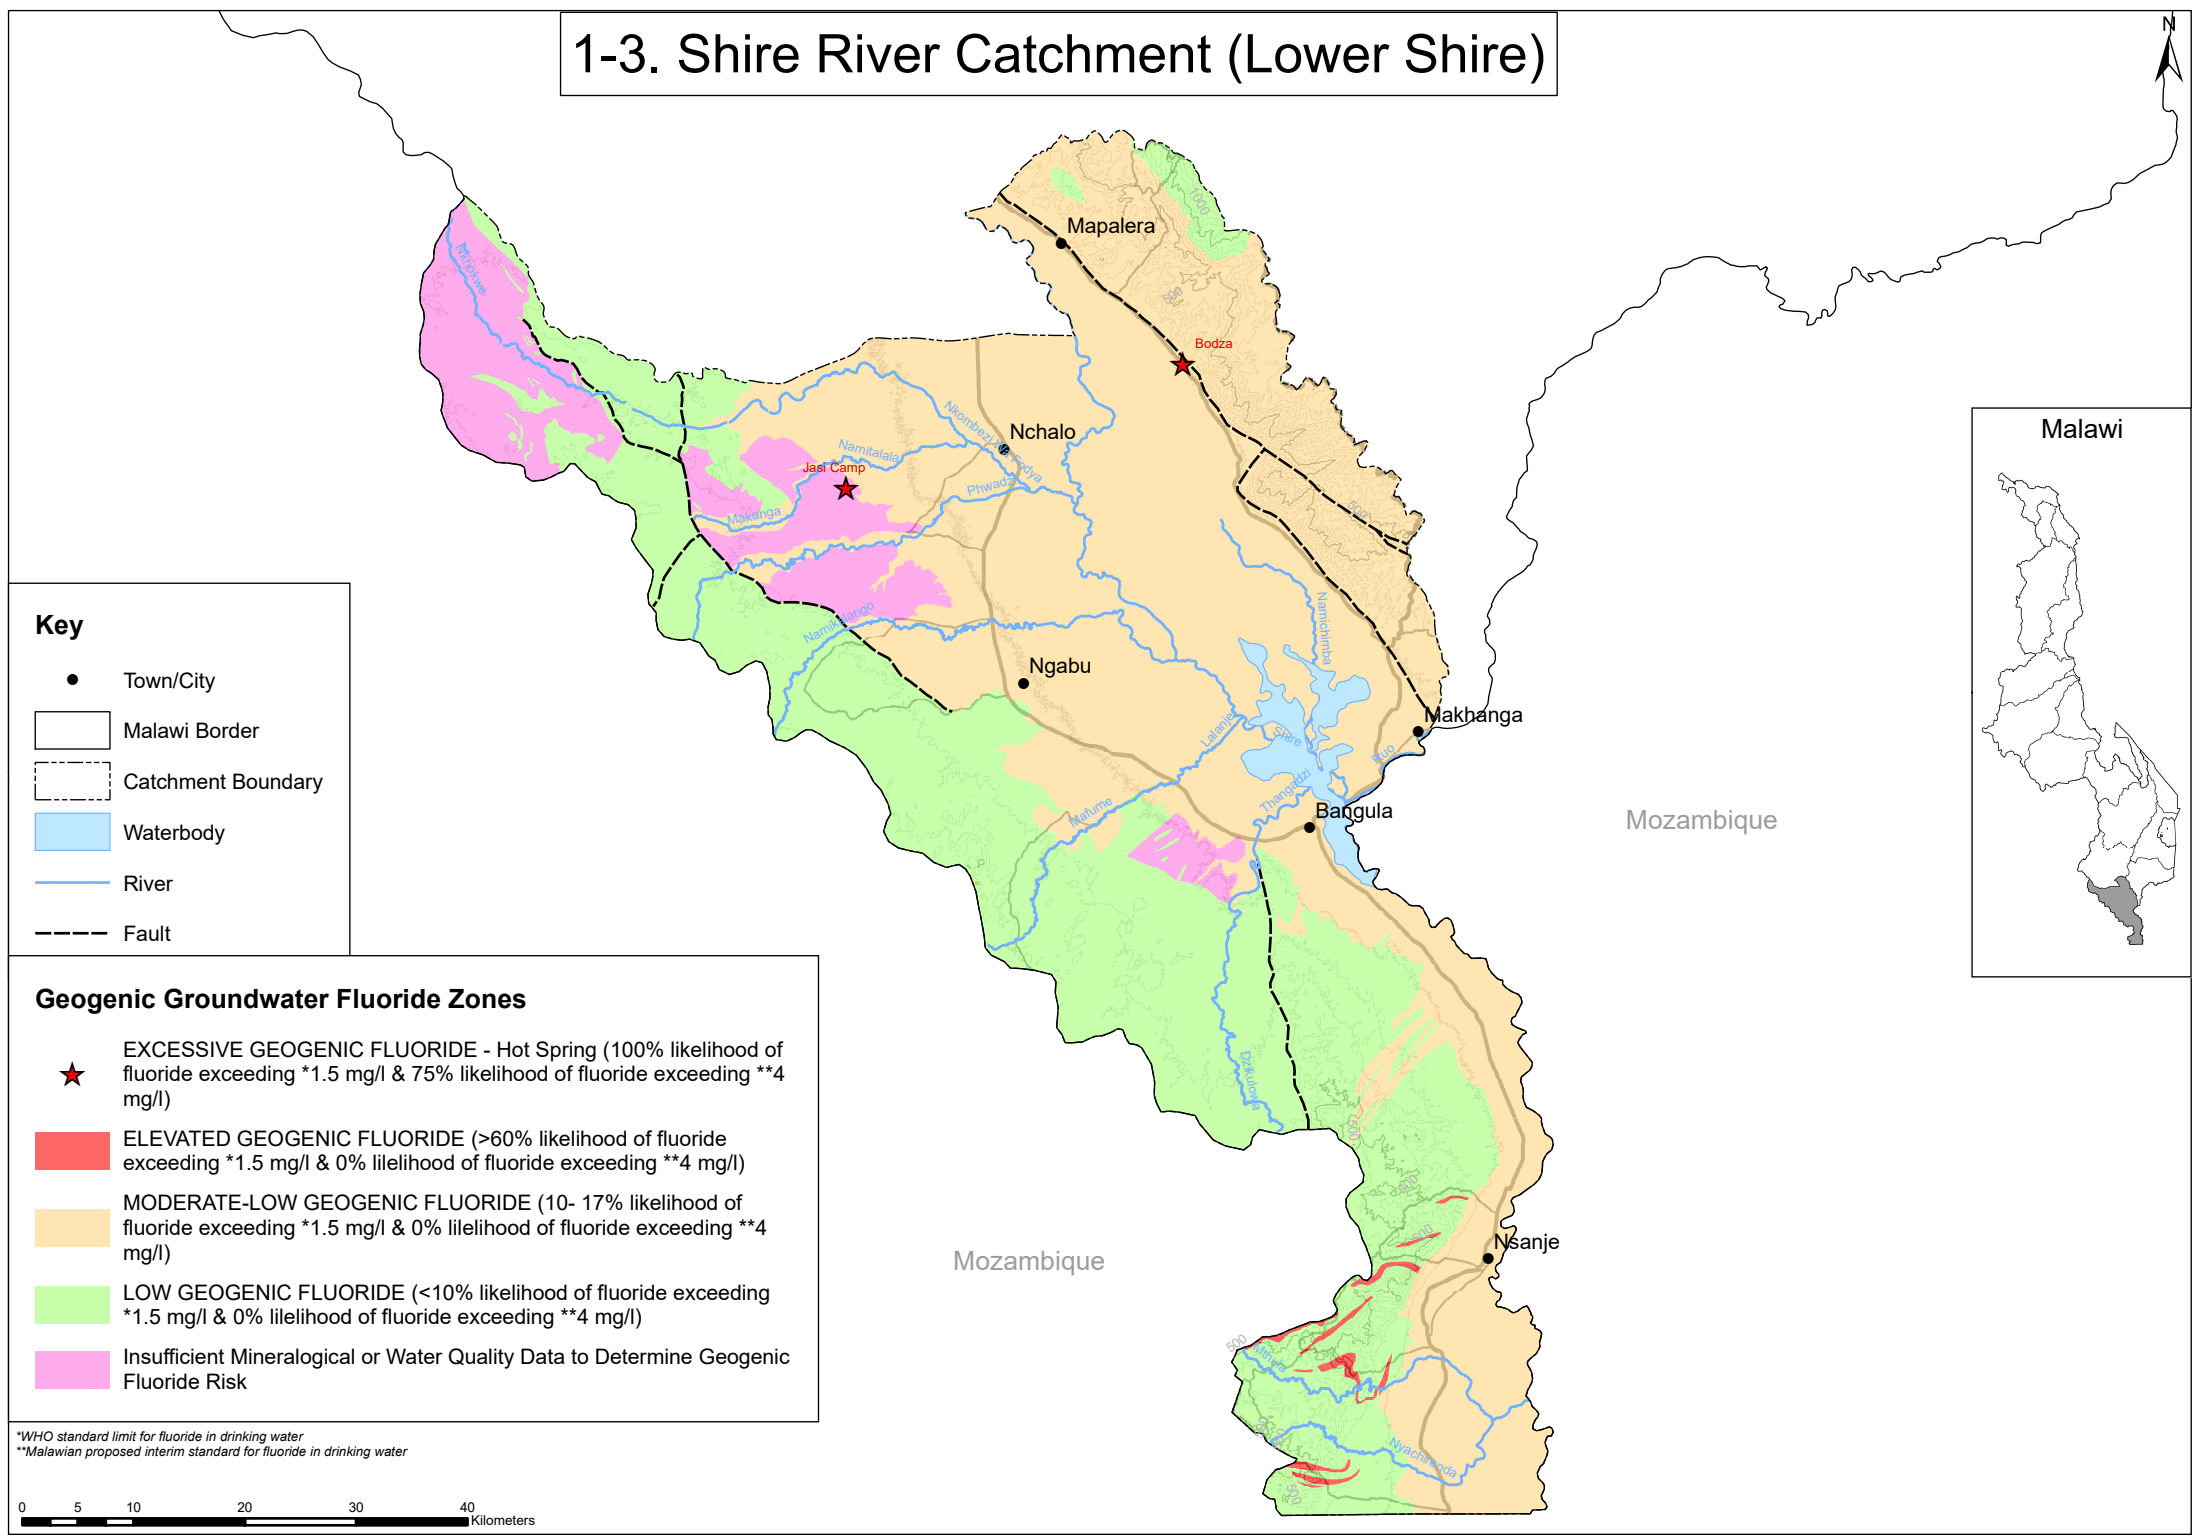

Supplement: s1 [file s1]

# Geology of Zomba

Malawi

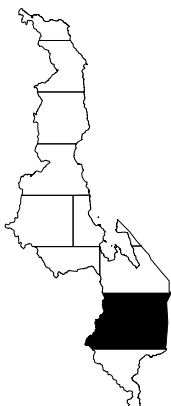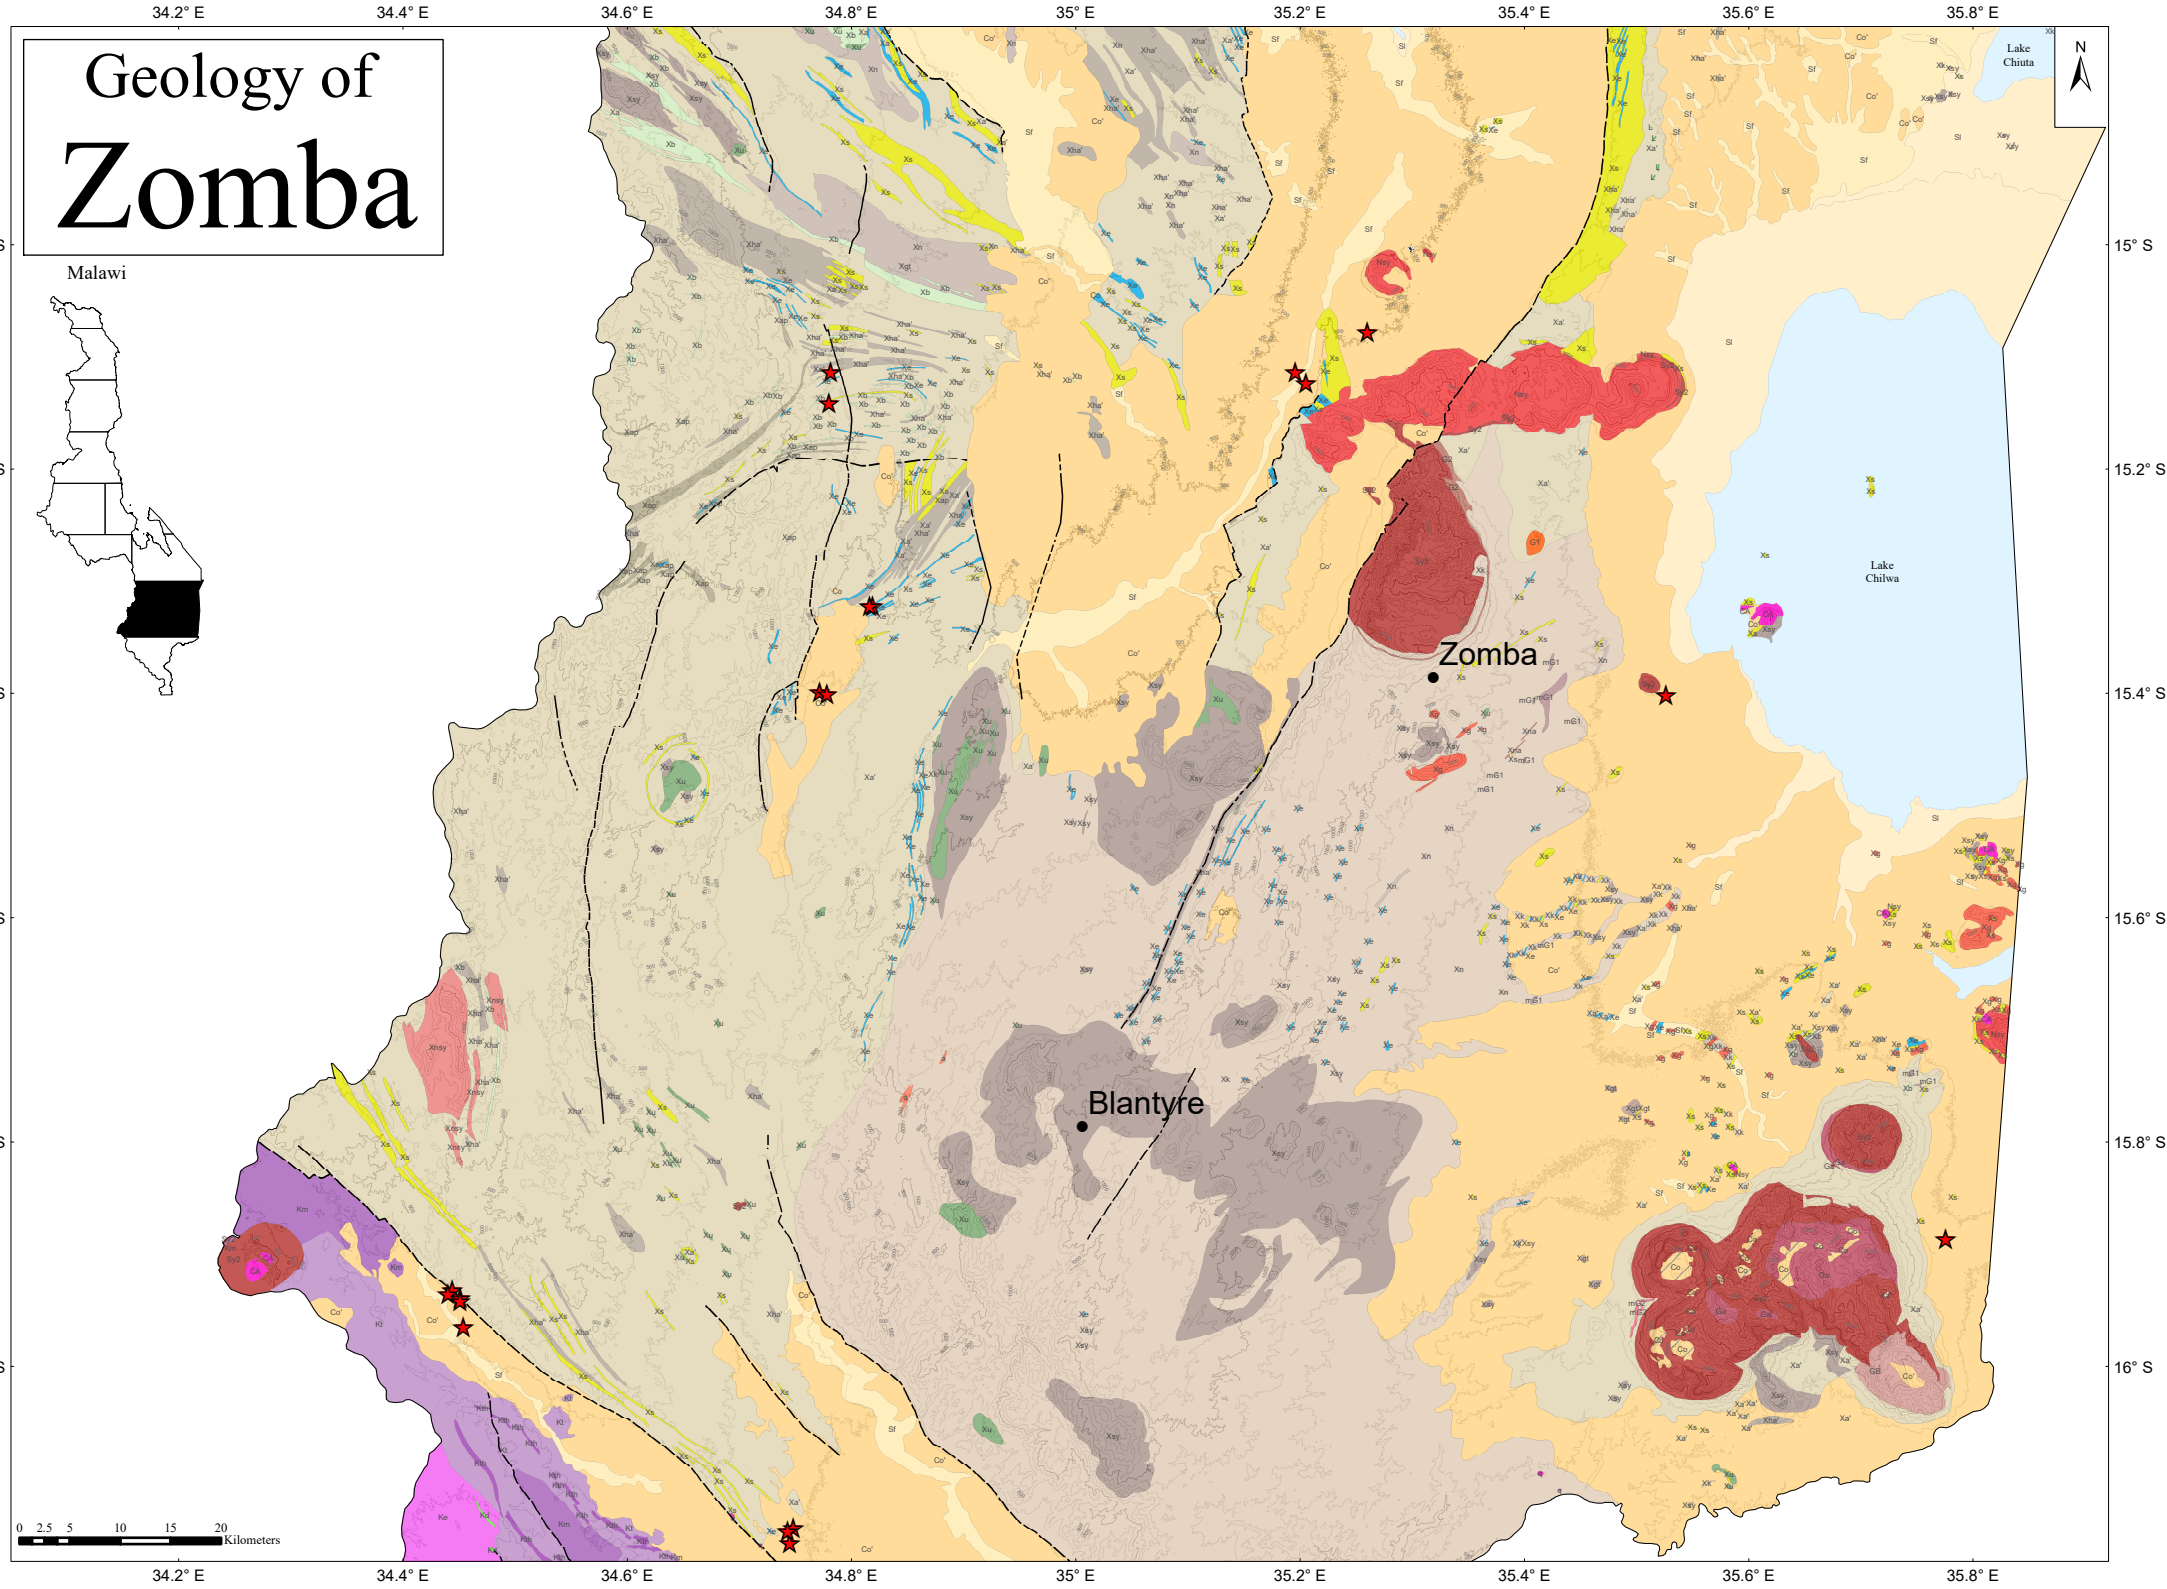

Supplement: s1 [file s1]

# Geology of Nyika

Malawi

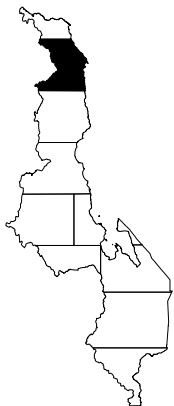

0 2.5 5 10 15 20 Kilometers

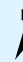

Lake Malawi

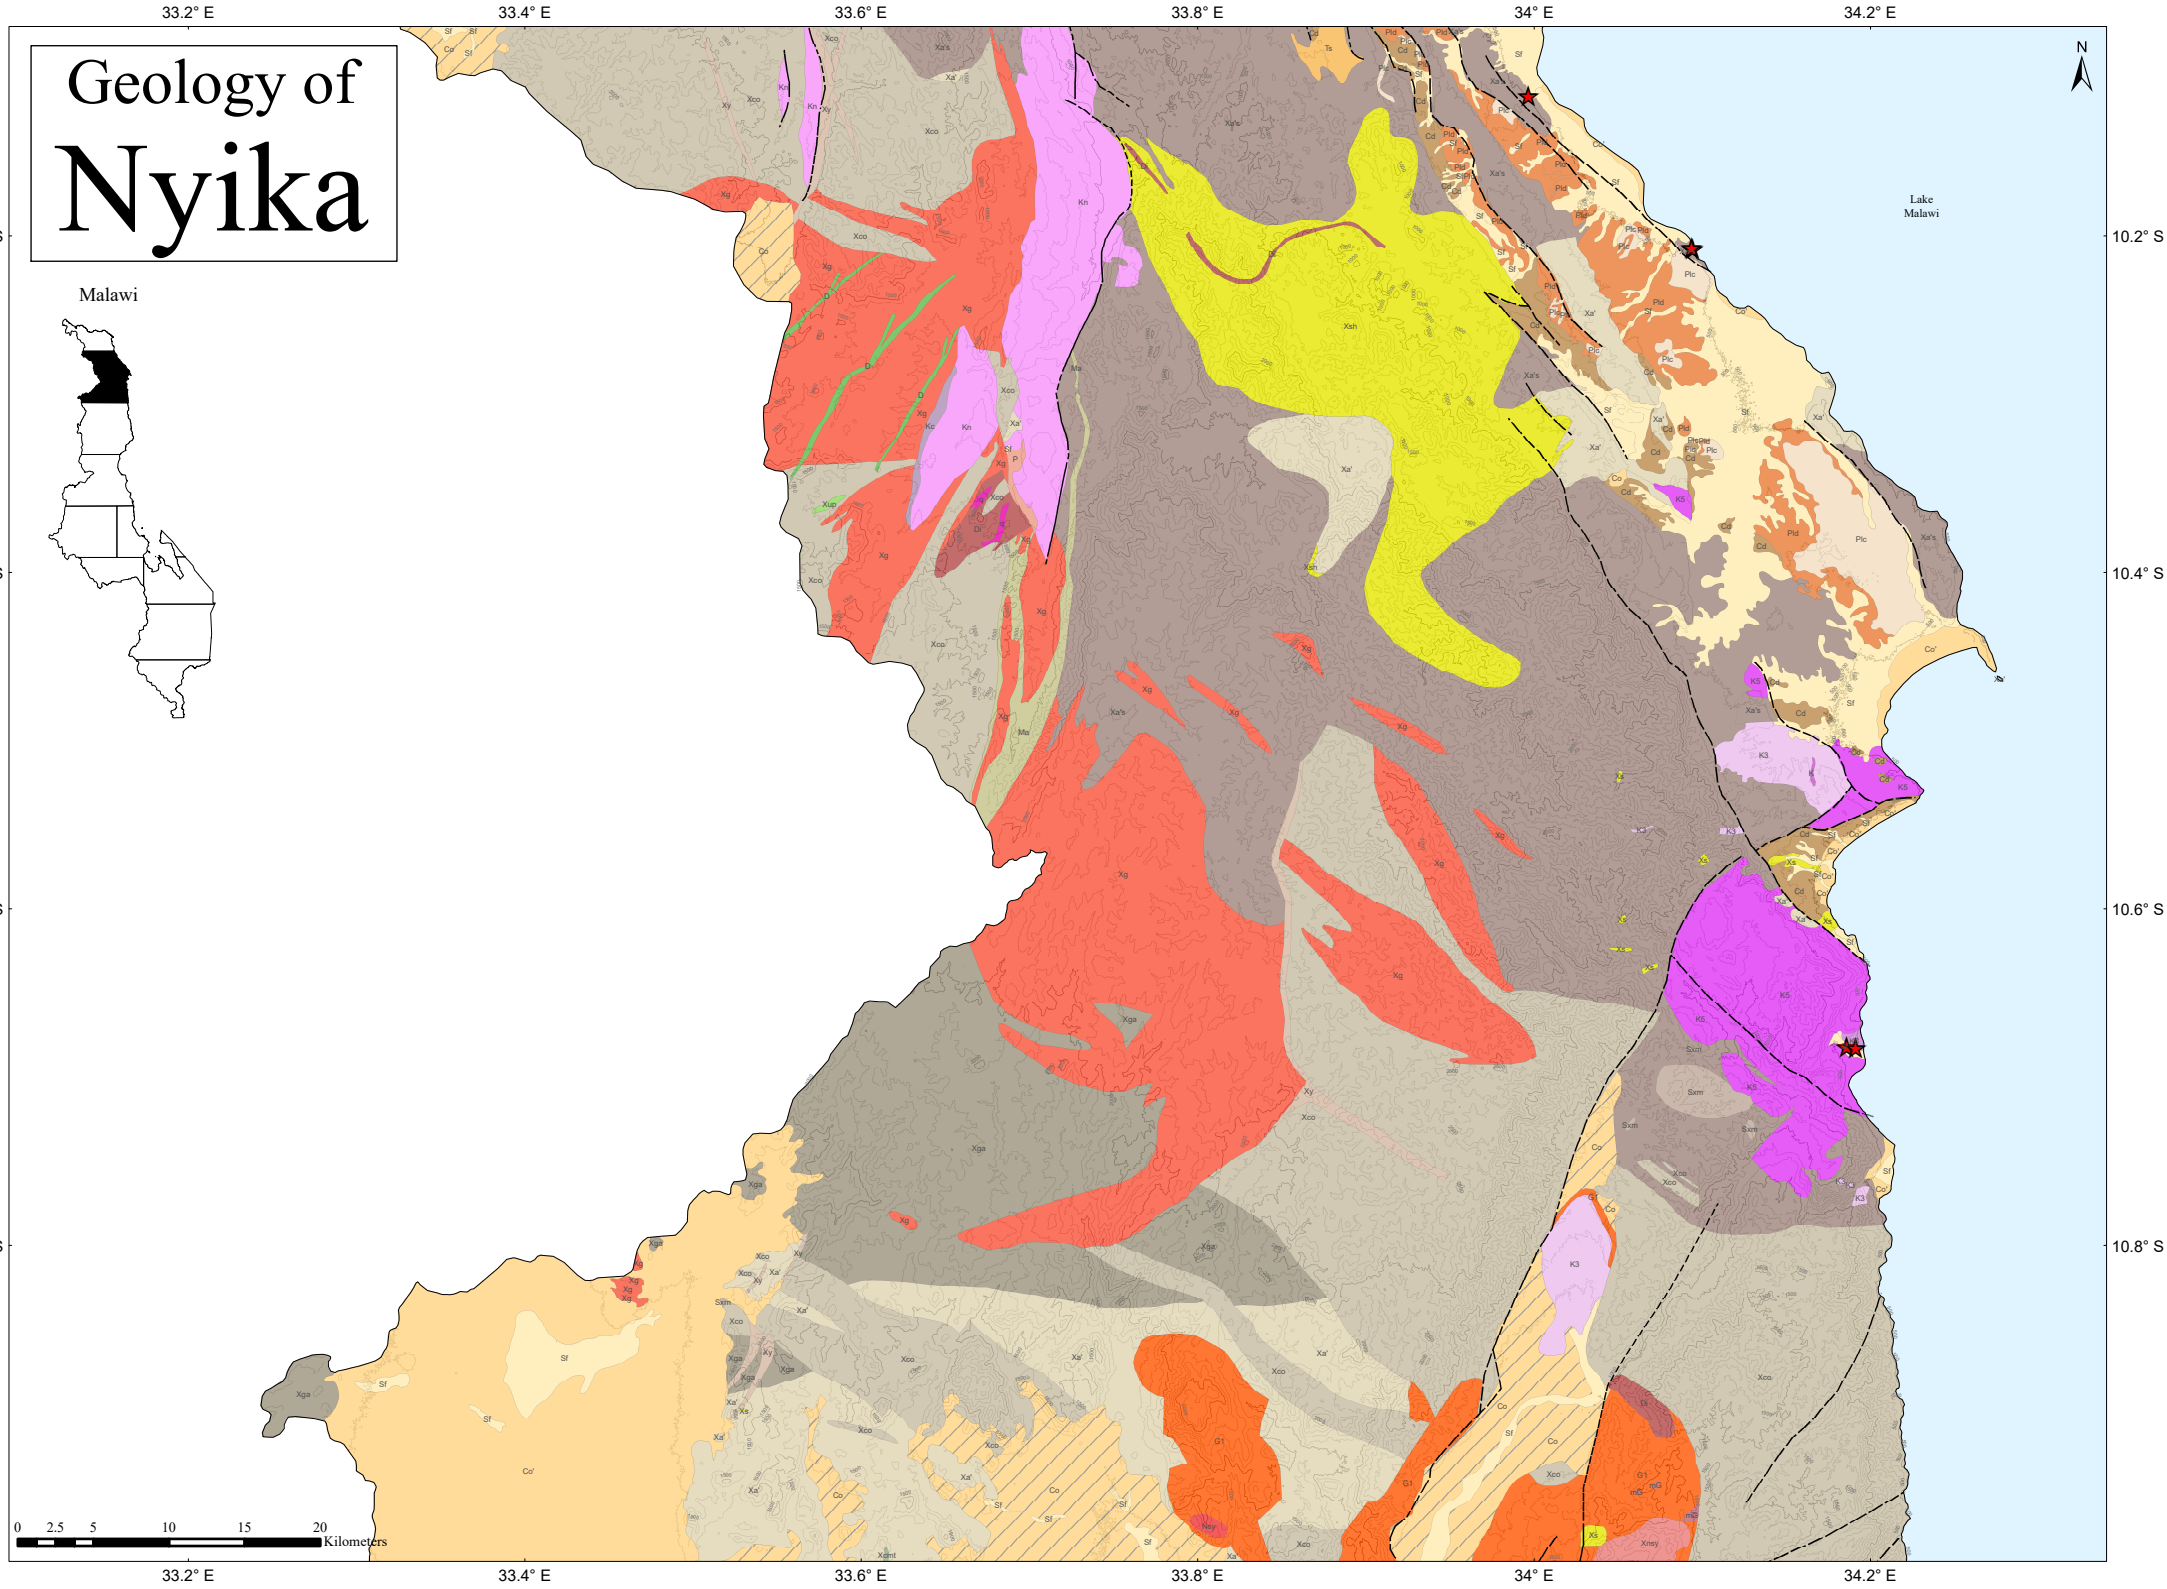

Supplement: s1 [file s1]

# Geology of Salima

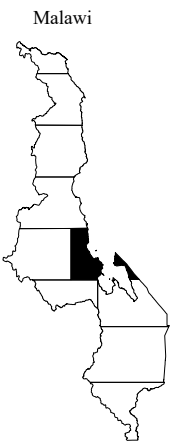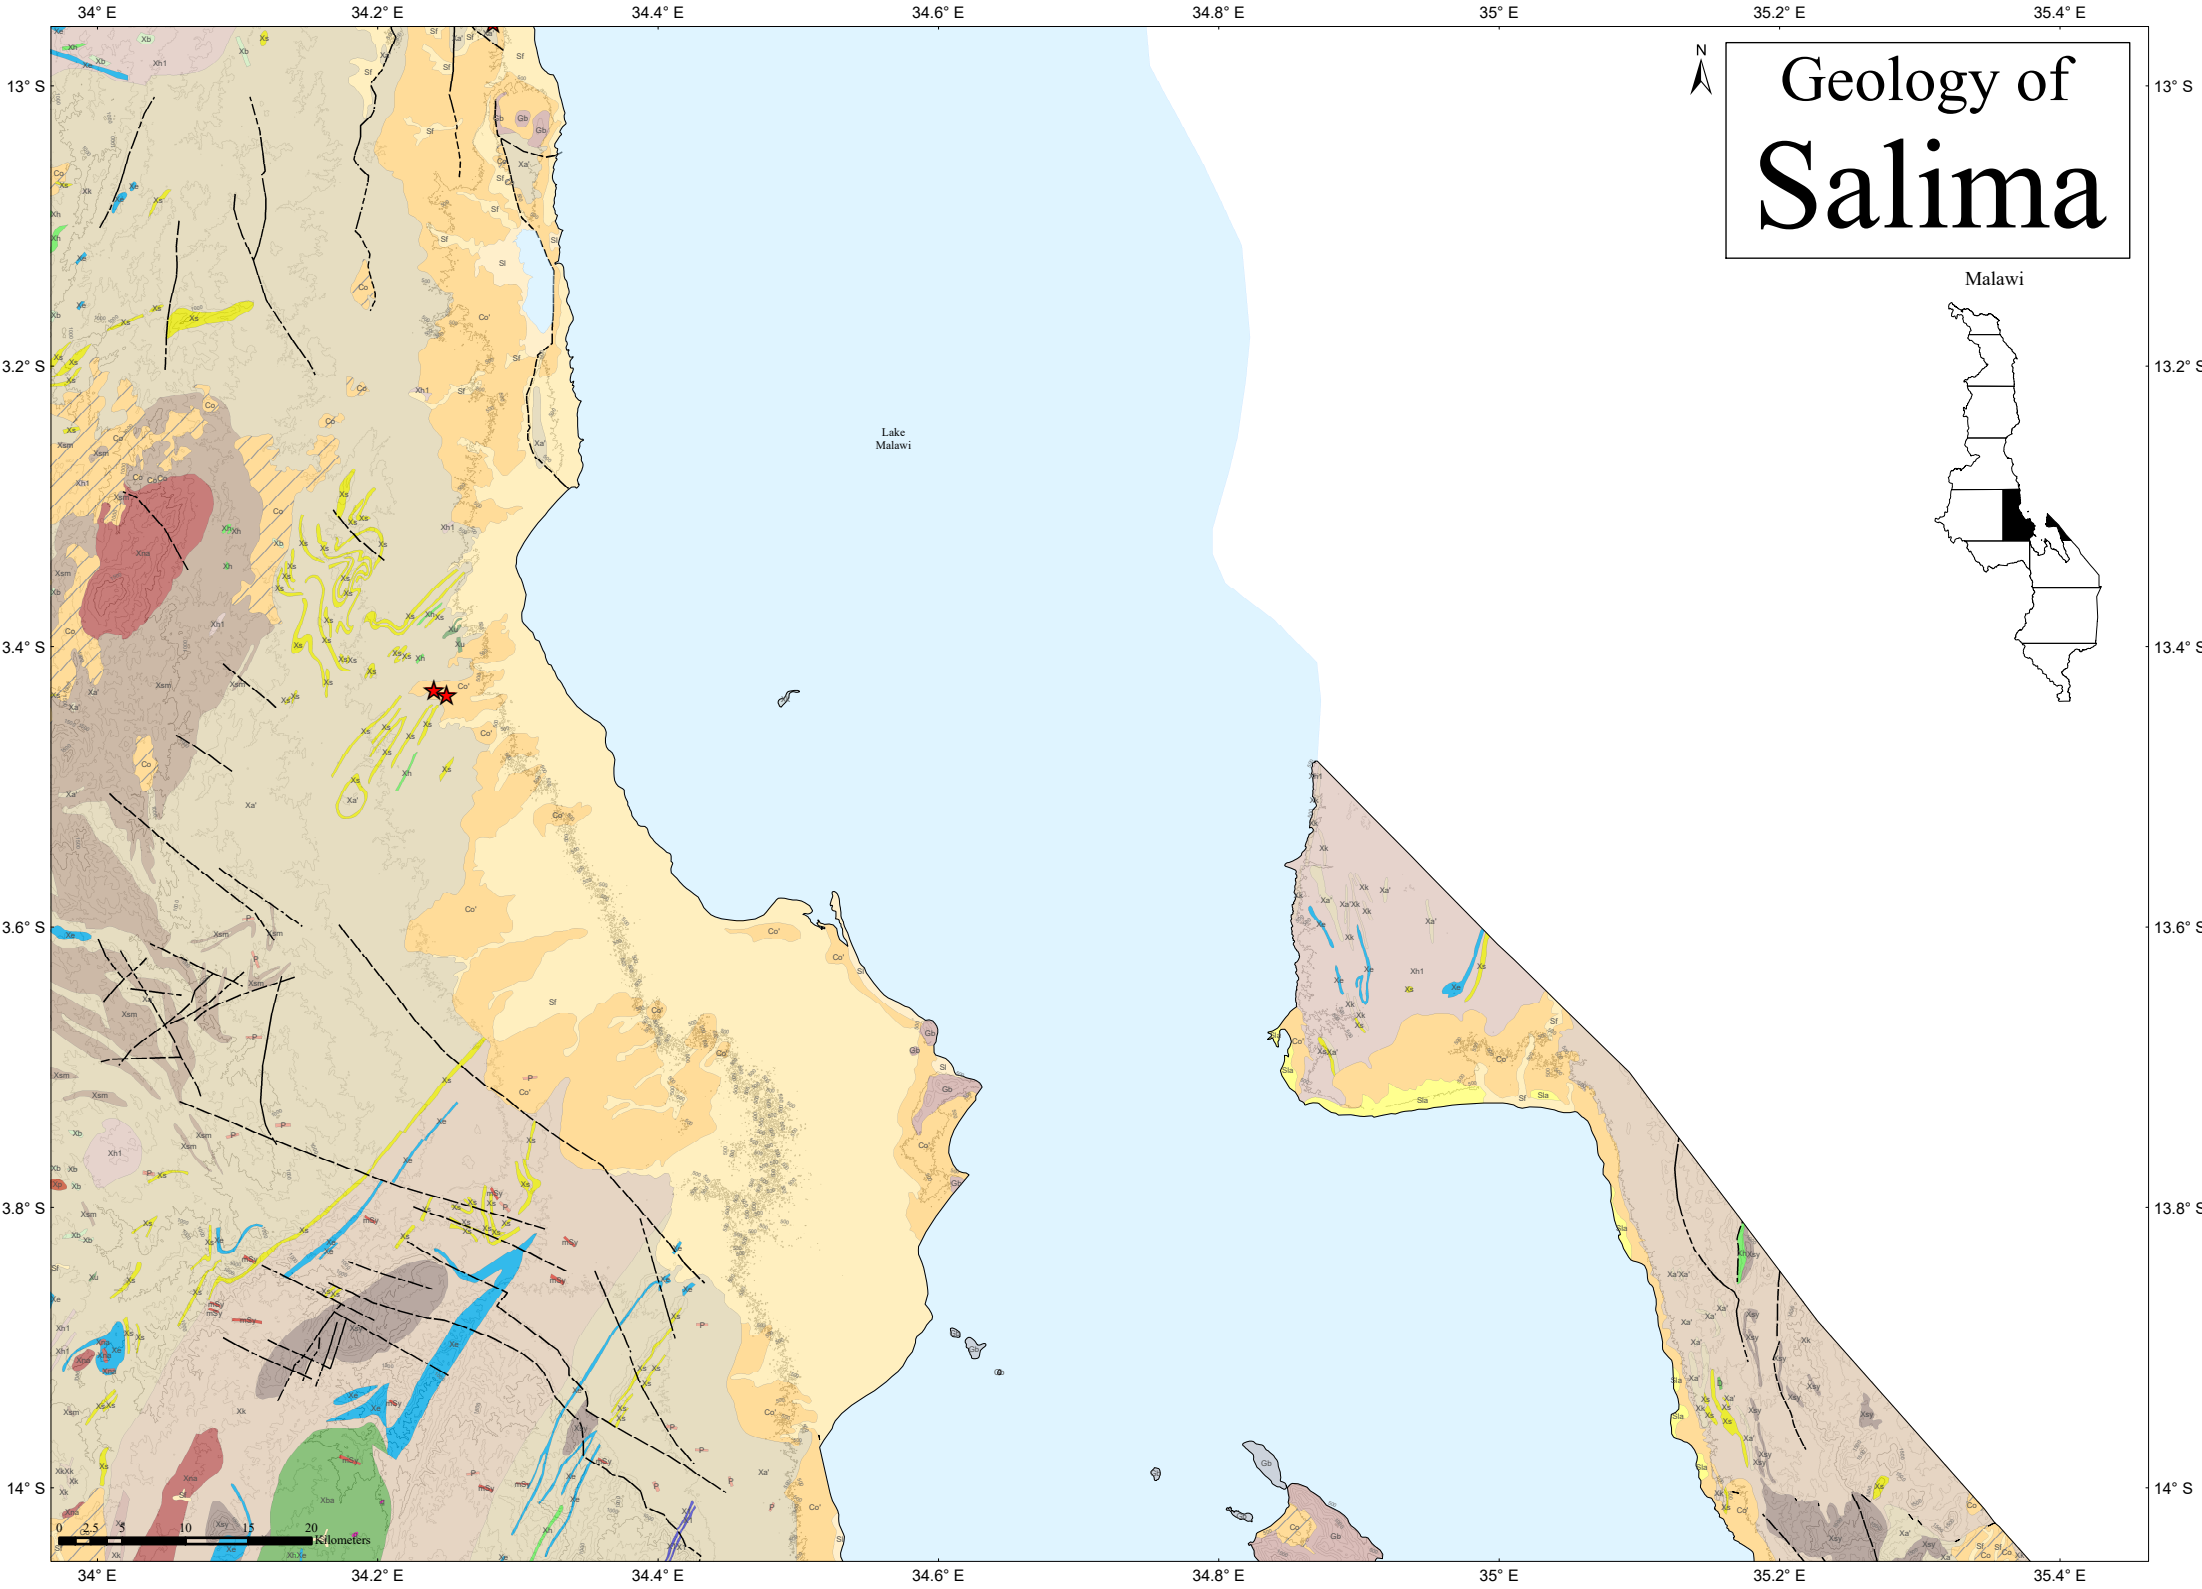

Supplement: s1 [file s1]

# Geology of Lilongwe

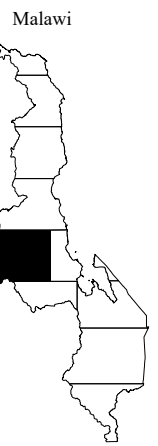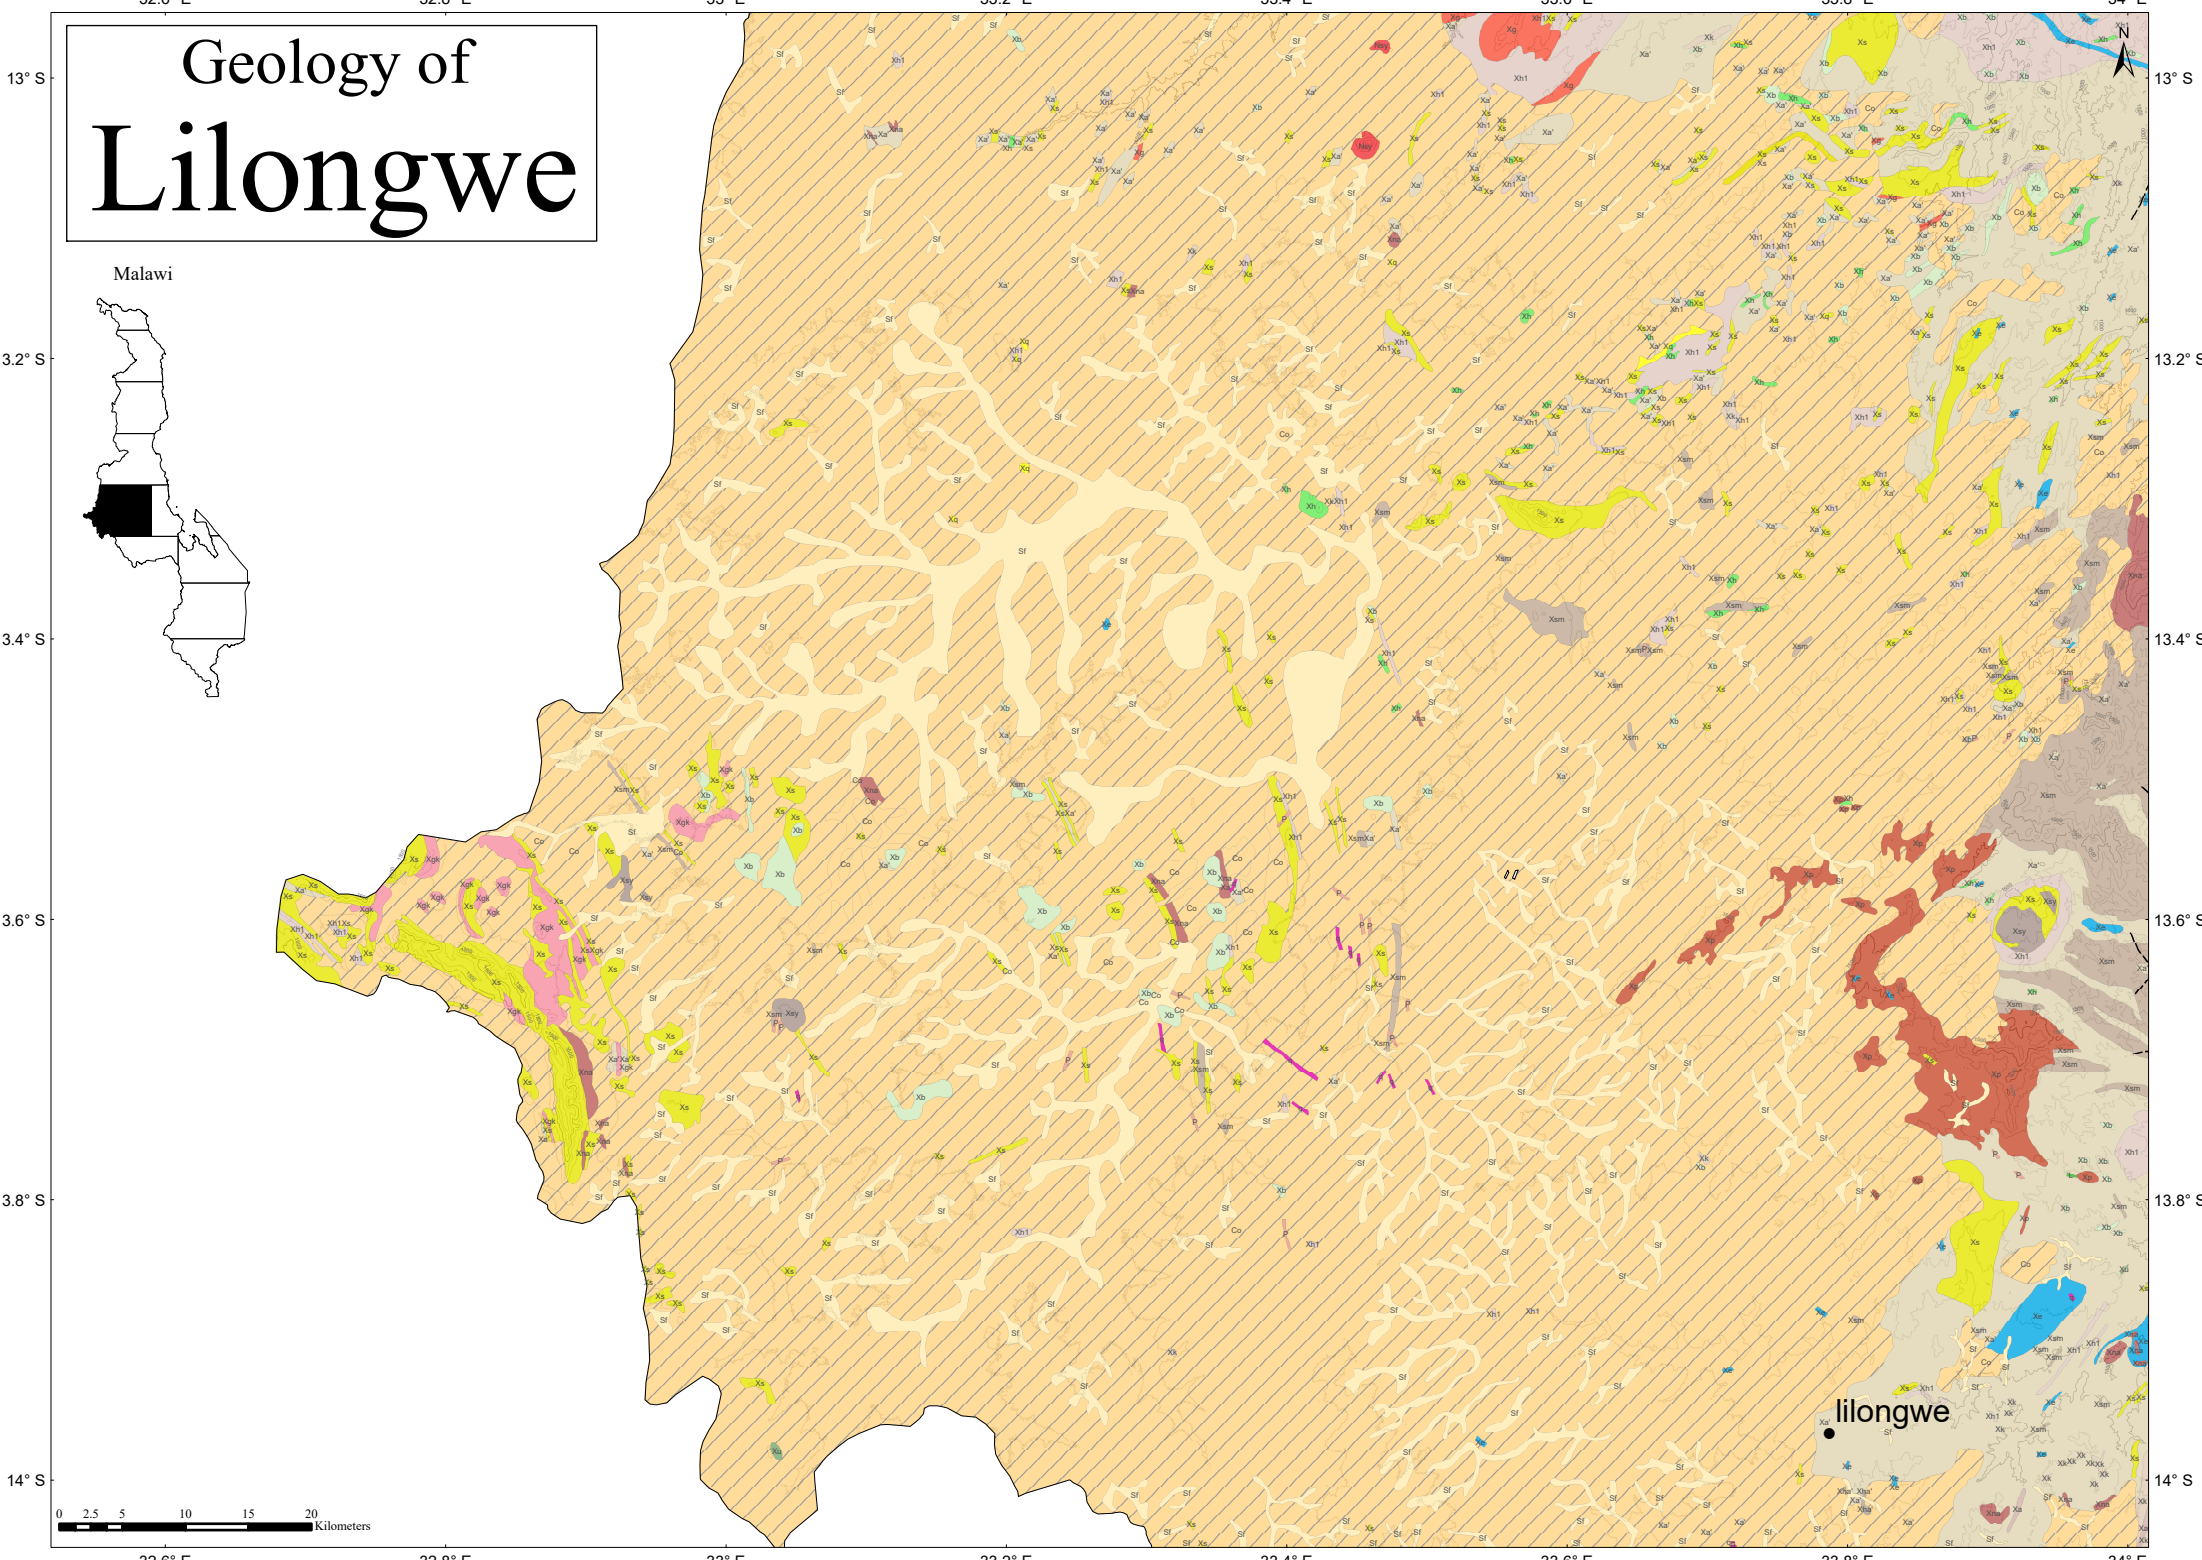

Supplement: s1 [file s1]

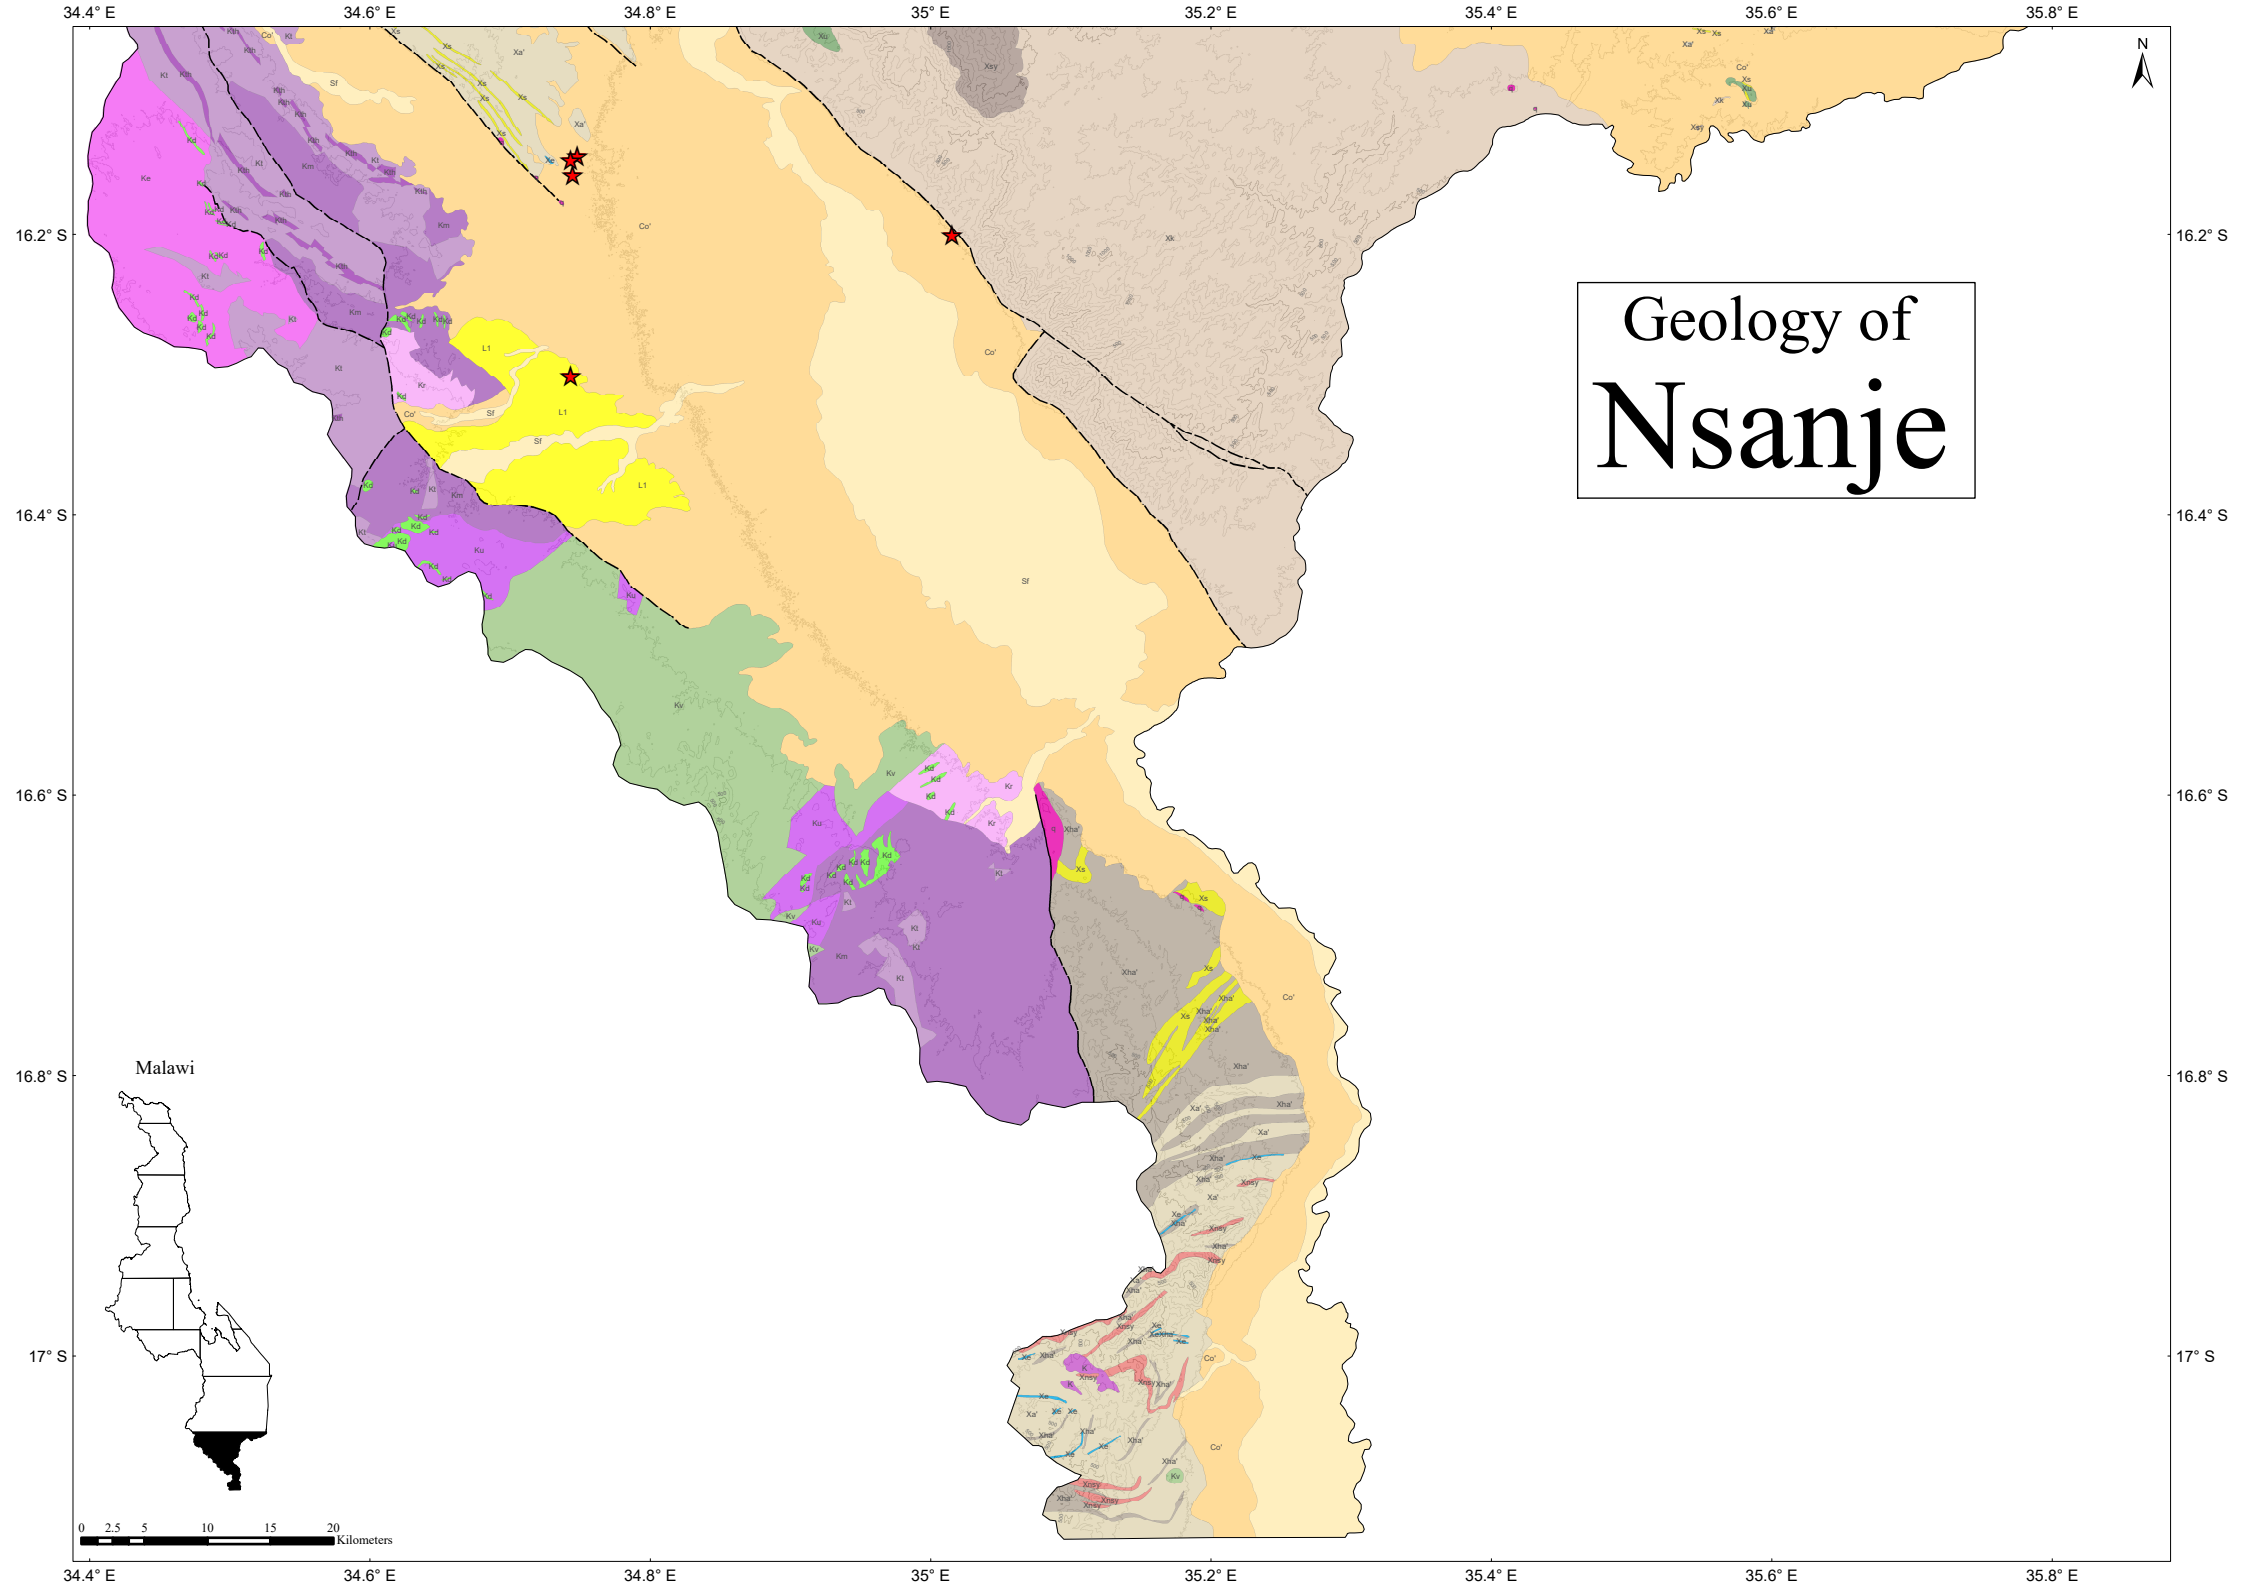

Supplement: s1 [file s1]

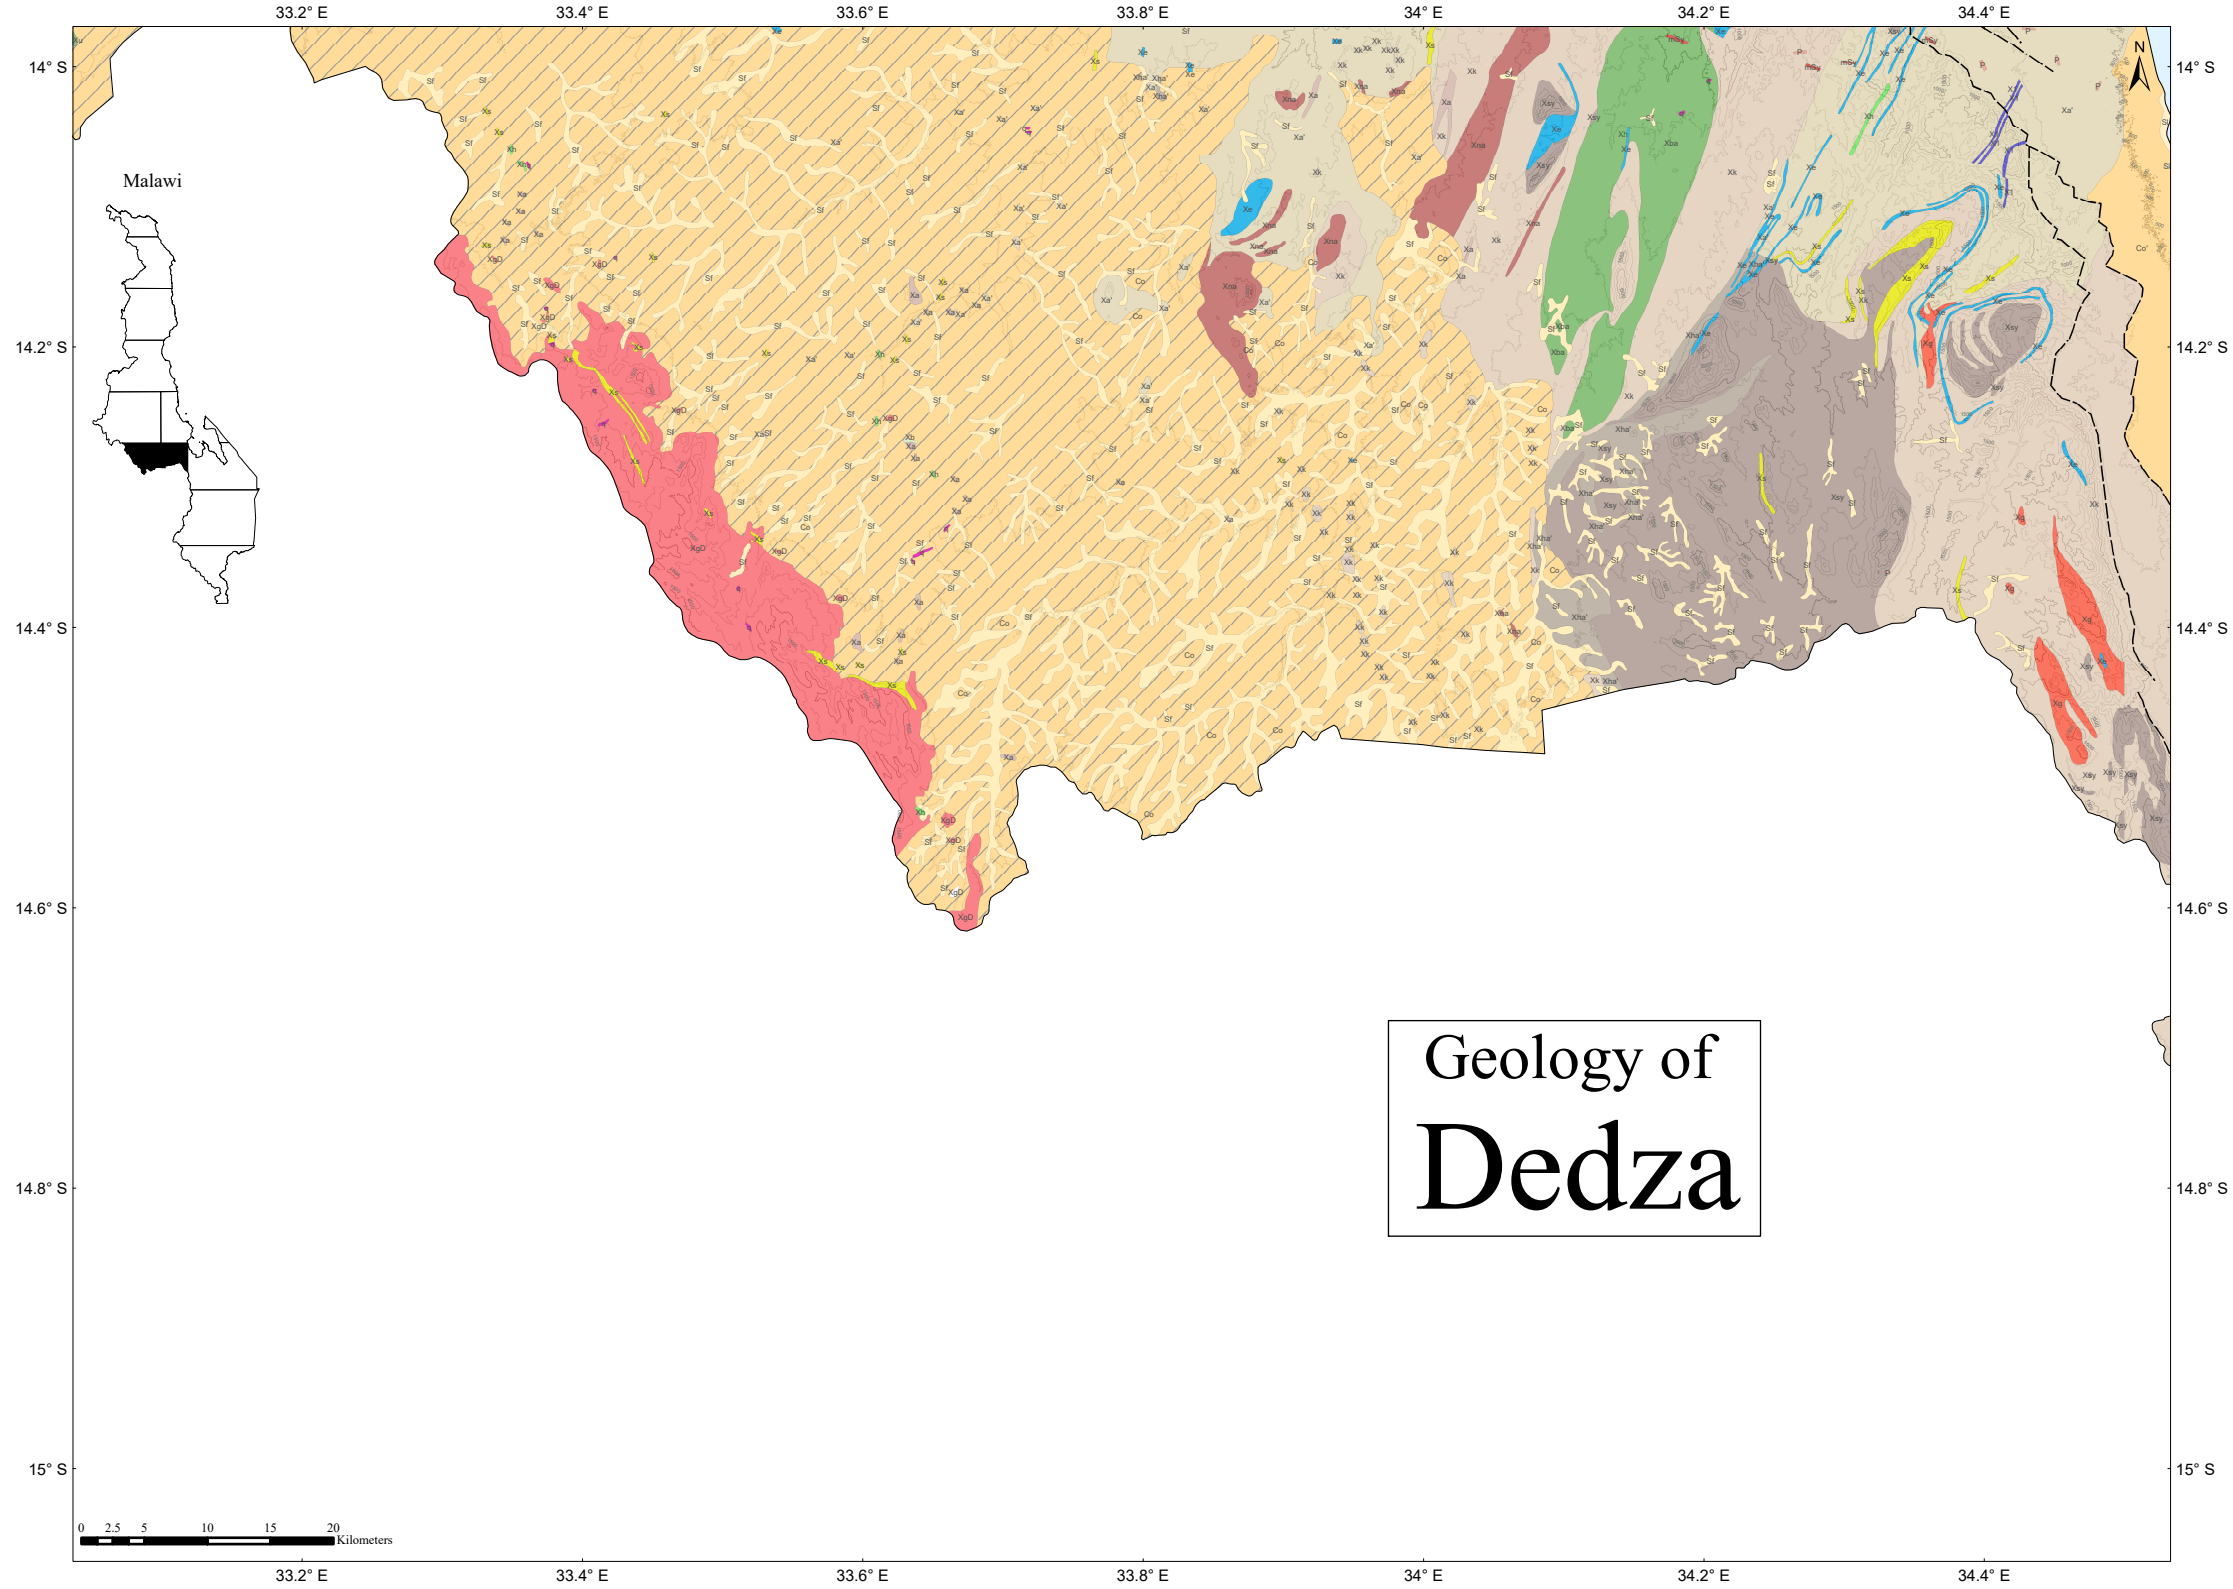

Supplement: s1 [file s1]

# 1-1. Shire River Catchment (Upper Shire)

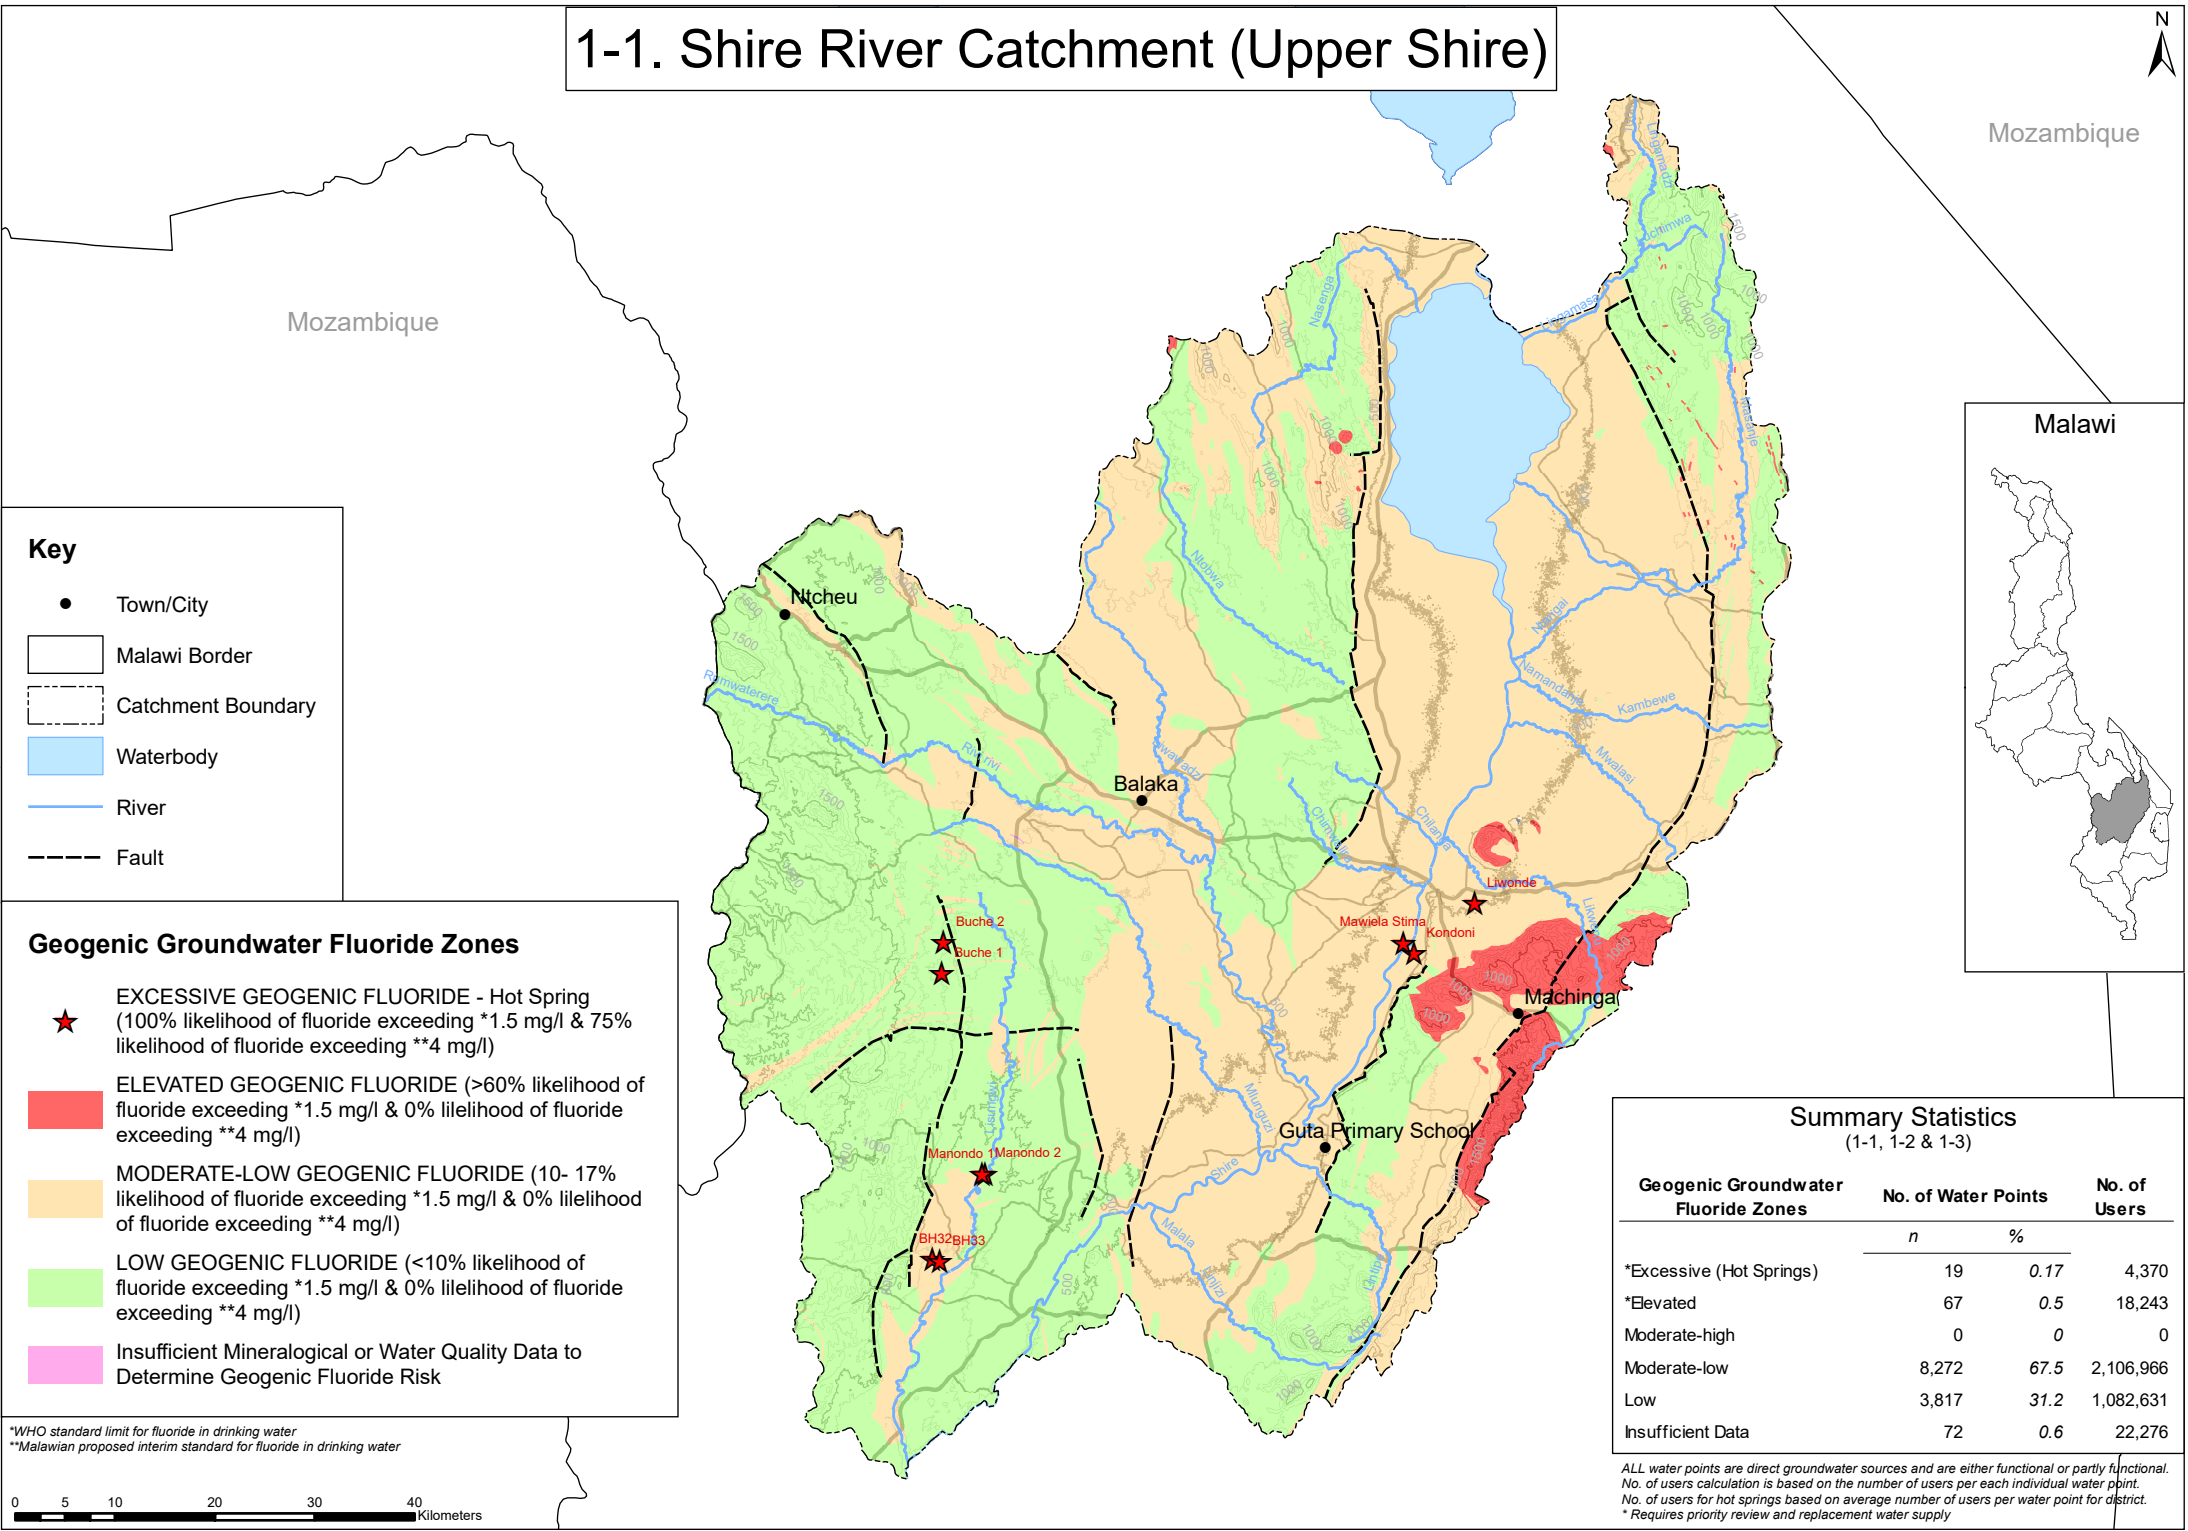

Supplement: s1 [file s1]

# Geology of Nkhotakota

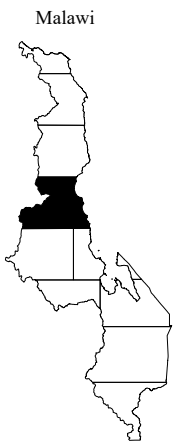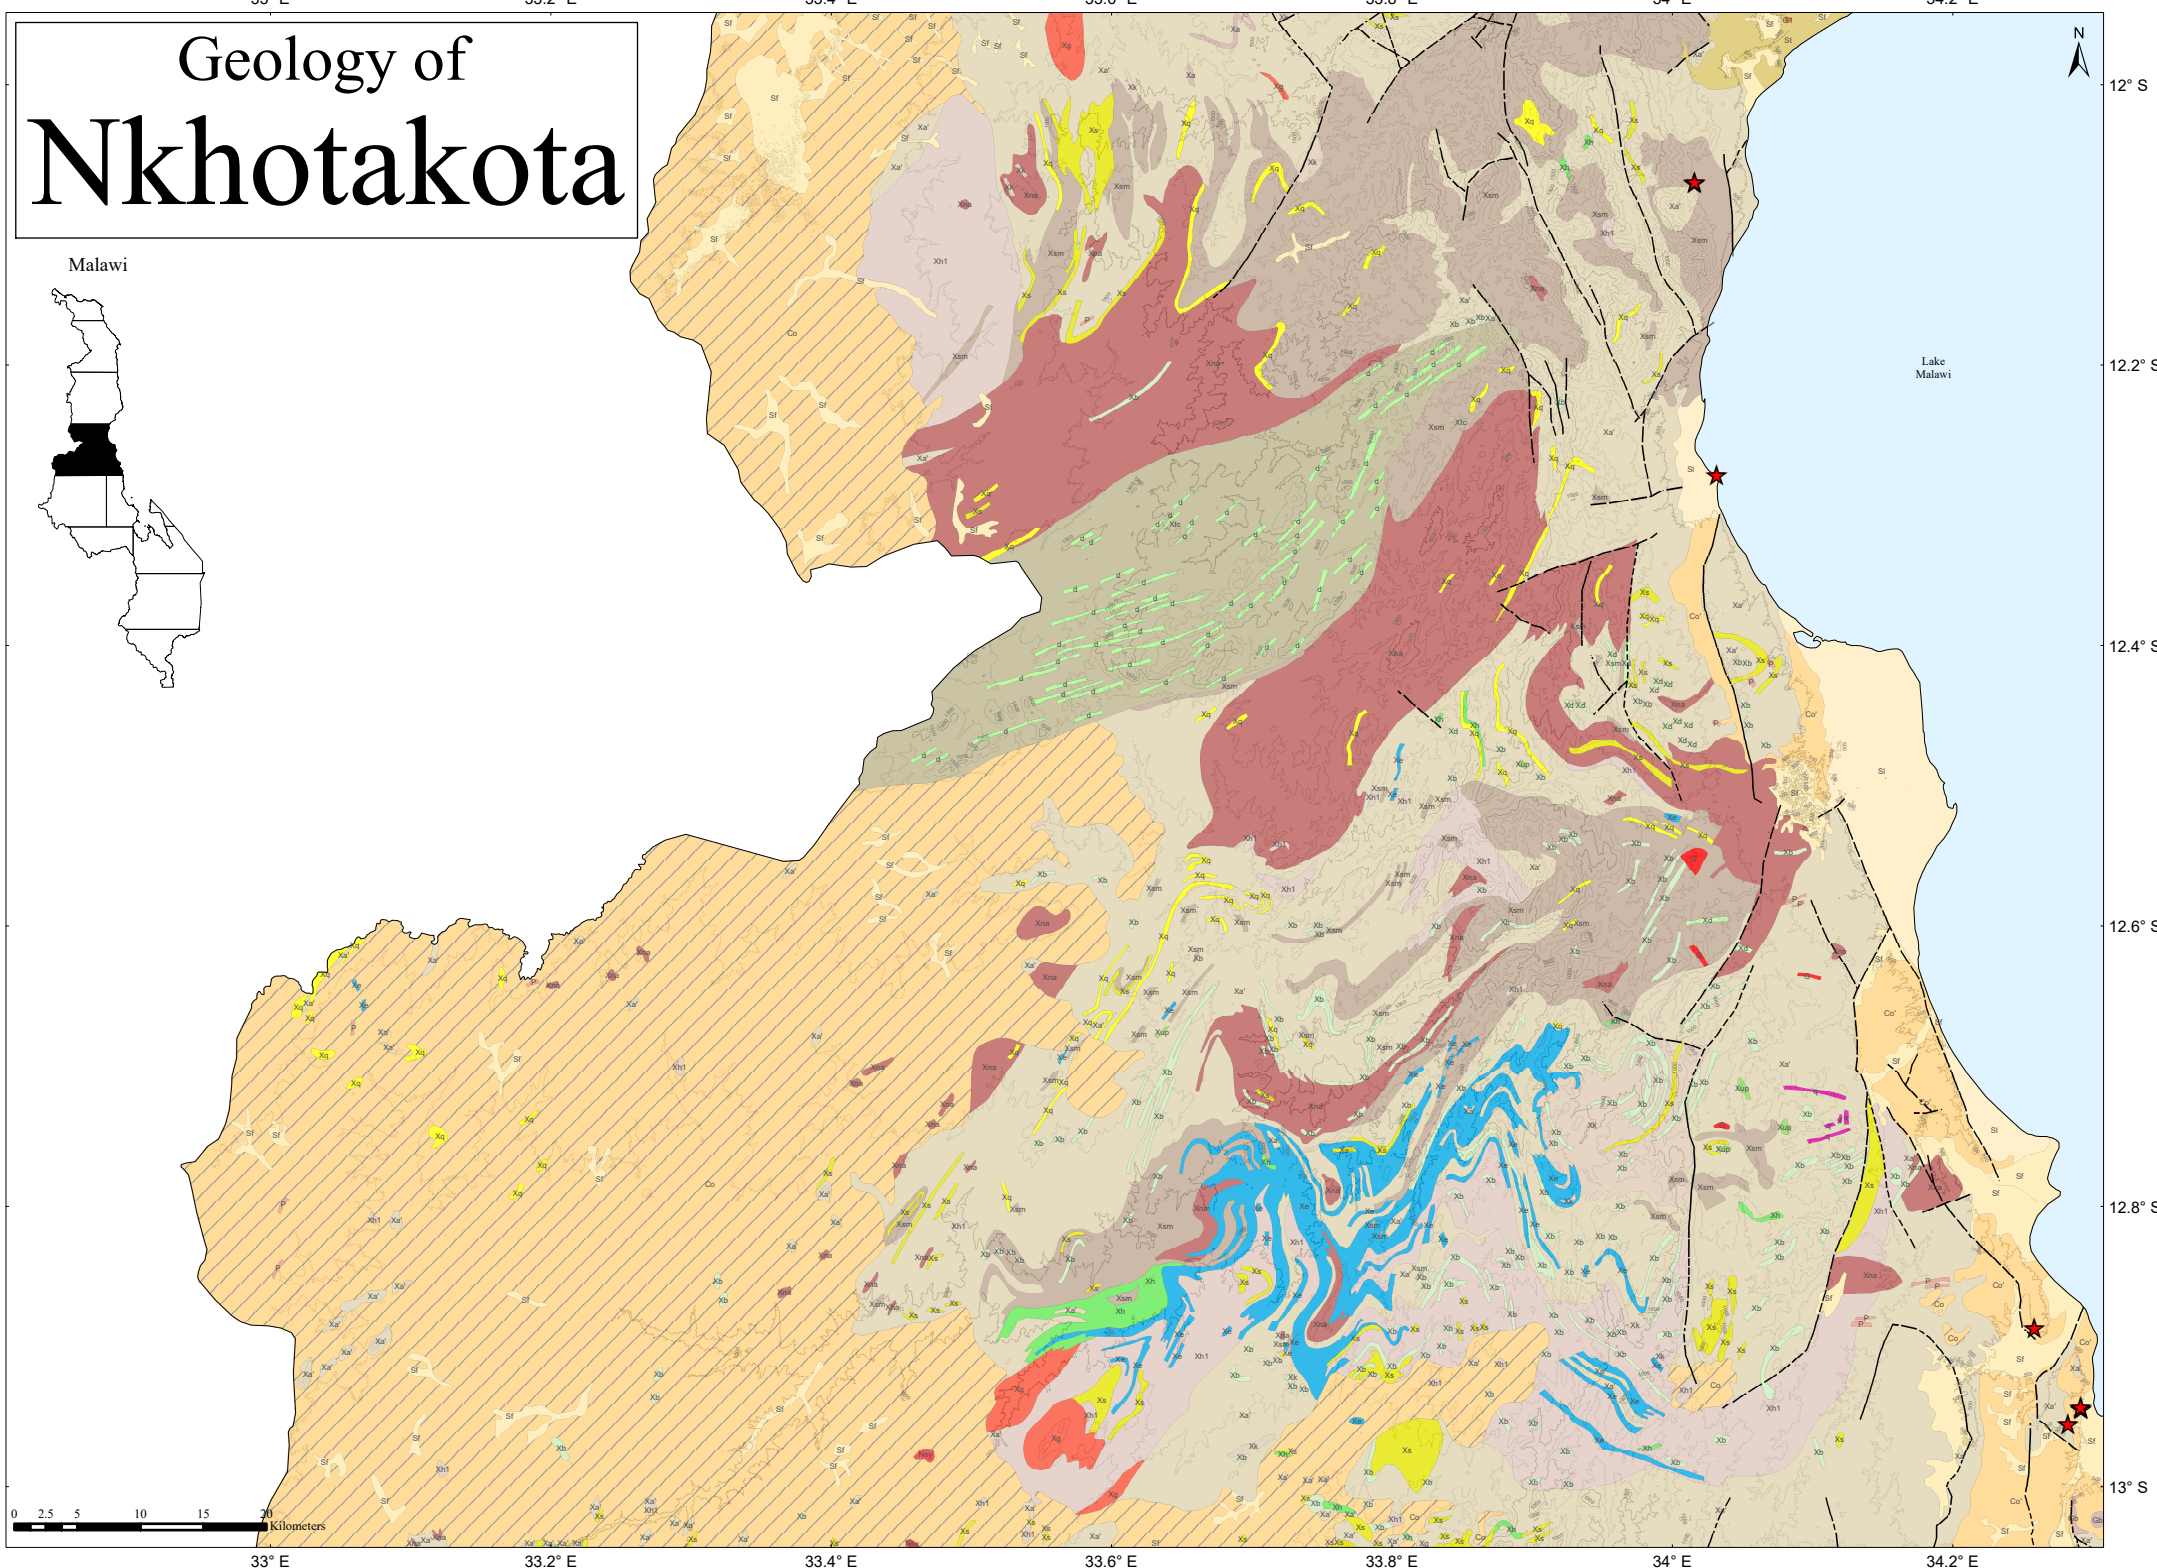

Supplement: s1 [file s1]

# Geology of Nkhata Bay

Malawi

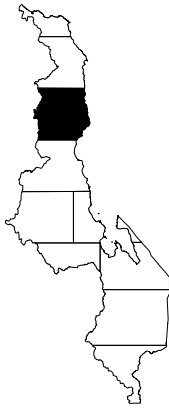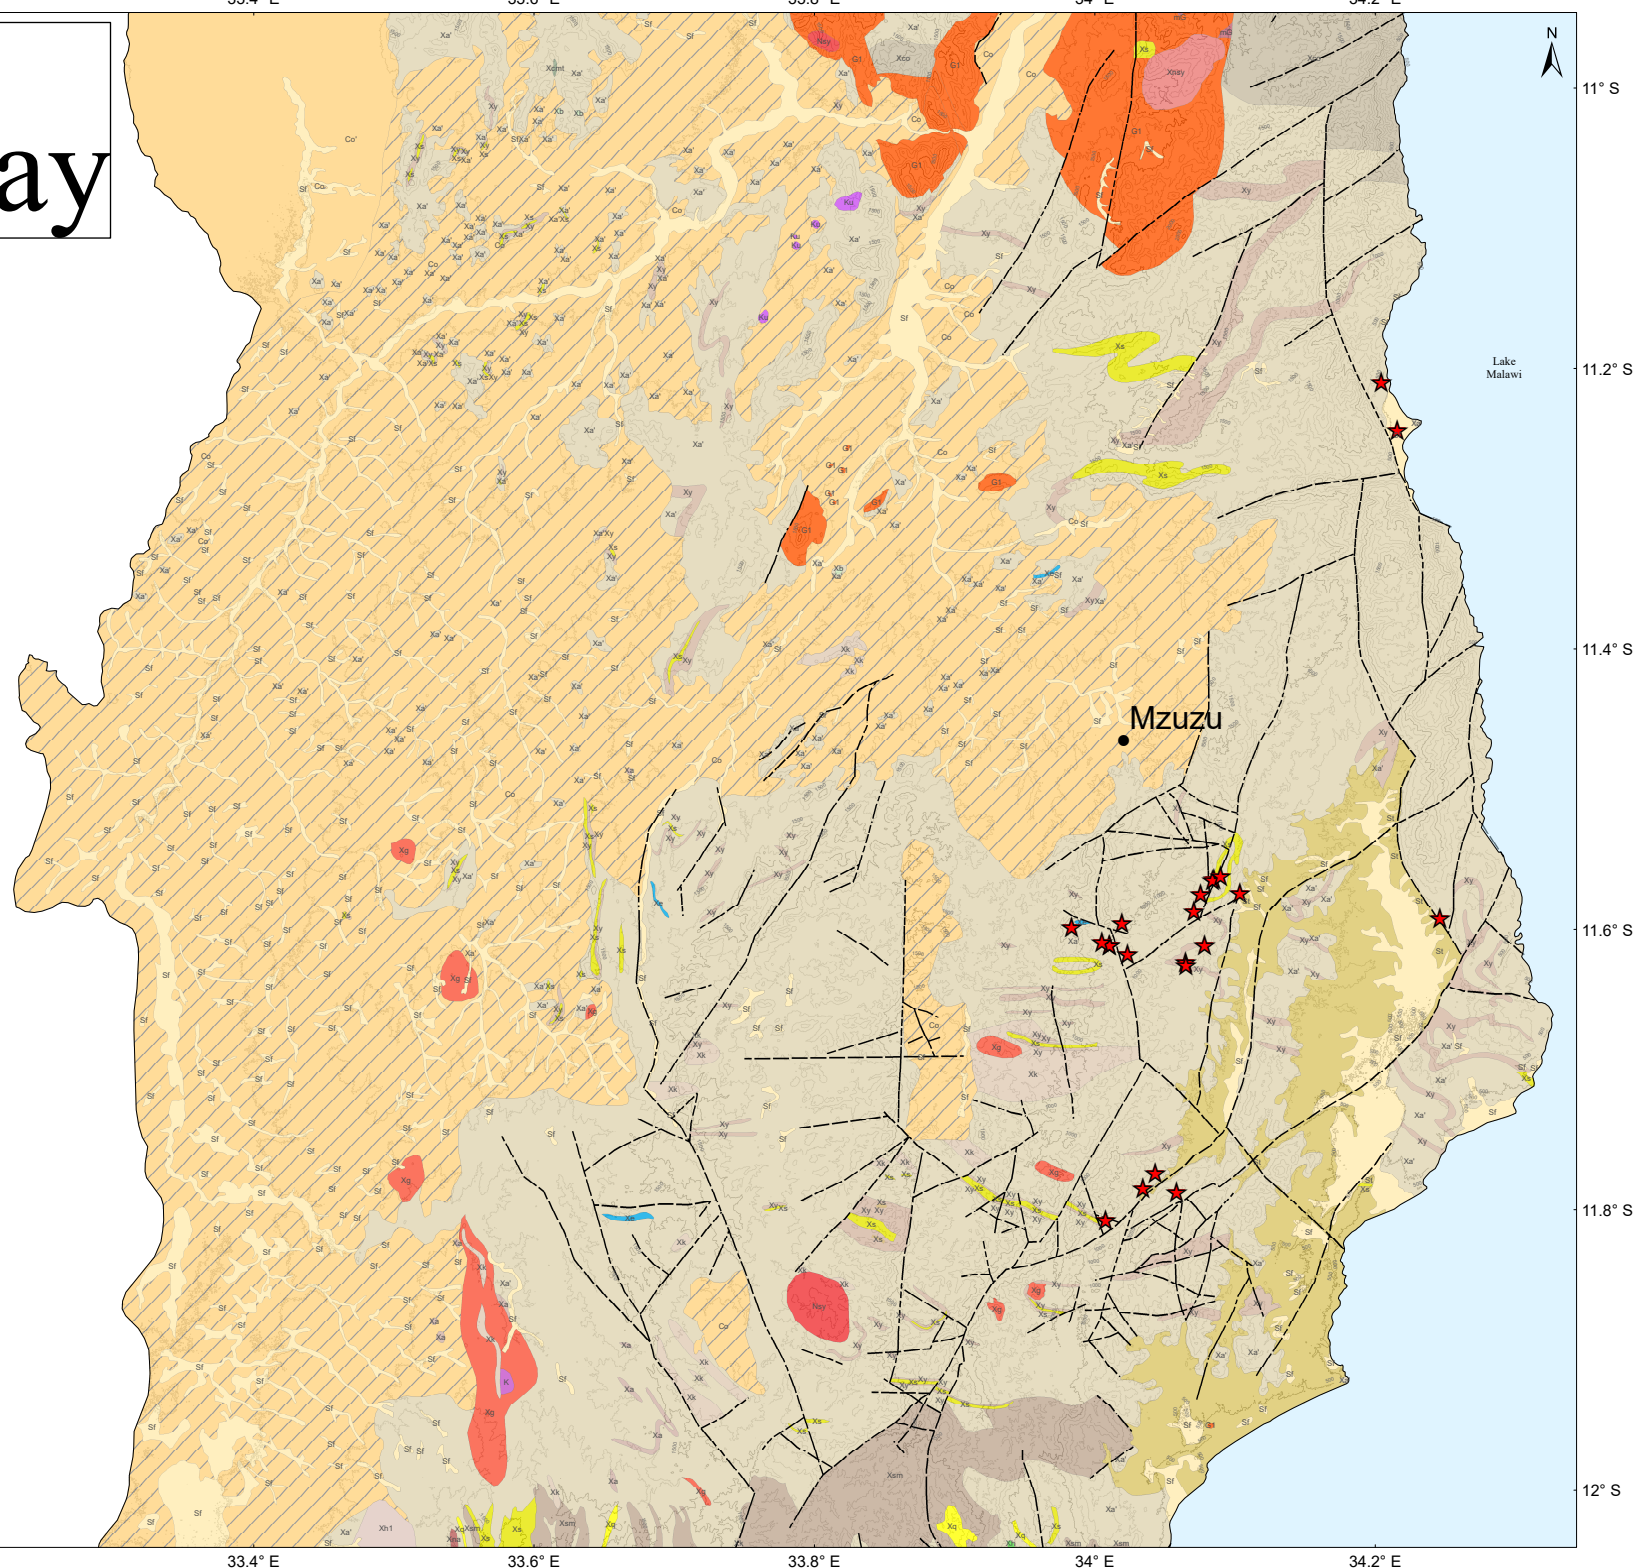

Supplement: s1 [file s1]
